# Supplementary material
Source: PubMed Central journal article supplement (PMC8591631)
Supplement: NIHMS1603084-supplement-2.pdf [file NIHMS1603084-supplement-2.pdf]

## **Data S2: Structural determination of selected MDM metabolites**

### **Contents:**

**A. Capecitabine and deglycocapecitabine**

**B. Hydrocortisone and 20 $\beta$ -dihydrocortisone**

**C. Tolcapone and *N*-acetylamino-tolcapone**

**D. Misoprostol and misoprostol acid**

**E. Mycophenolate mofetil and mycophenolic acid**

**F. Spironolactone and 7 $\alpha$ -thiospironolactone**

## A. Capecitabine and deglycopecitabine

The expected molecular formula of deglycopecitabine (C<sub>10</sub>H<sub>14</sub>FN<sub>3</sub>O<sub>3</sub>) was deduced from HR-MS data (**Table S1**). To confirm its structure, we isolated pure deglycopecitabine using HPLC. <sup>1</sup>H-NMR spectrum of deglycopecitabine was almost identical to that of capecitabine, except for the absence of the sugar moiety (**Table 1 and Figure 1**) and the presence of one proton of 1-NH at chemical shift 11.16 ppm. MS/MS experiments confirmed the absence of the sugar in deglycopecitabine as compared to capecitabine (**Figure 2**). Altogether, the results confirmed the structure of the metabolite as deglycopecitabine.

**Table 1.** <sup>1</sup>H NMR data for capecitabine and purified deglycopecitabine (500 MHz in DMSO-D<sub>6</sub>)

| Position           | δH, mult (J in Hz)<br>Capecitabine | δH, mult (J in Hz)<br>Deglycopecitabine |
|--------------------|------------------------------------|-----------------------------------------|
| 1-NH               | ND*                                | 11.16, br                               |
| 2                  |                                    |                                         |
| 3                  |                                    |                                         |
| 4                  |                                    |                                         |
| 5                  |                                    |                                         |
| 6-CH               | 8.01, s                            | 7.95, s                                 |
| 7-NH               | 10.52, br                          | 11.16, br                               |
| 8                  |                                    |                                         |
| 9-CH <sub>2</sub>  | 4.07, m <sup>b</sup>               | 4.05, t                                 |
| 10-CH <sub>2</sub> | 1.61, p                            | 1.60, p                                 |
| 11-CH <sub>2</sub> | 1.32, m <sup>b</sup>               | 1.32, m <sup>b</sup>                    |
| 12-CH <sub>2</sub> | 1.32, m <sup>b</sup>               | 1.32, m <sup>b</sup>                    |
| 13-CH <sub>3</sub> | 0.88, t                            | 0.88, m <sup>b</sup>                    |
| 14-CH              | 5.67, d                            | ND                                      |
| 15-CH              | 4.09, m <sup>b</sup>               | ND                                      |
| -OH                | 5.14                               | ND                                      |
| 16-CH              | 3.68, t                            | ND                                      |
| -OH                | 5.14, br                           | ND                                      |
| 17-CH              | 3.90, p                            | ND                                      |
| 18-CH <sub>3</sub> | 1.31, m <sup>b</sup>               | ND                                      |

<sup>b</sup> overlapped signal

\*ND: Not Detected

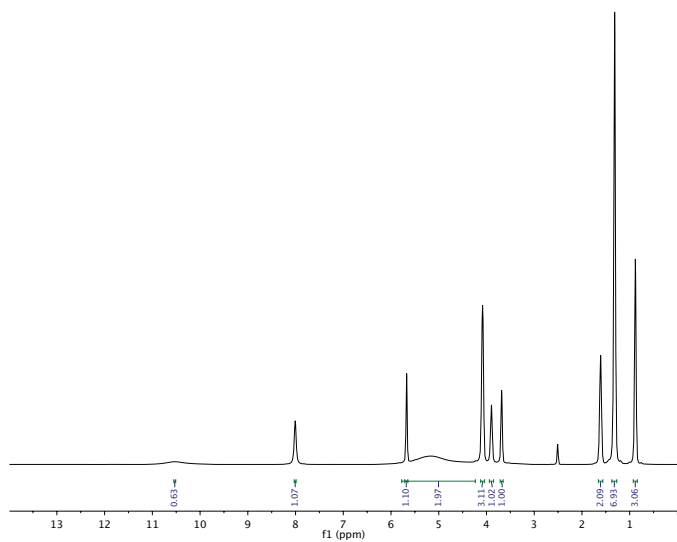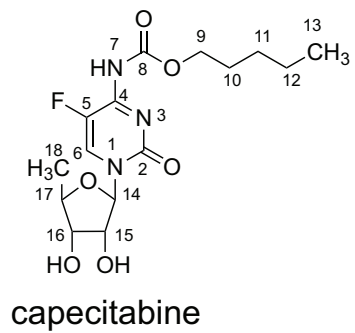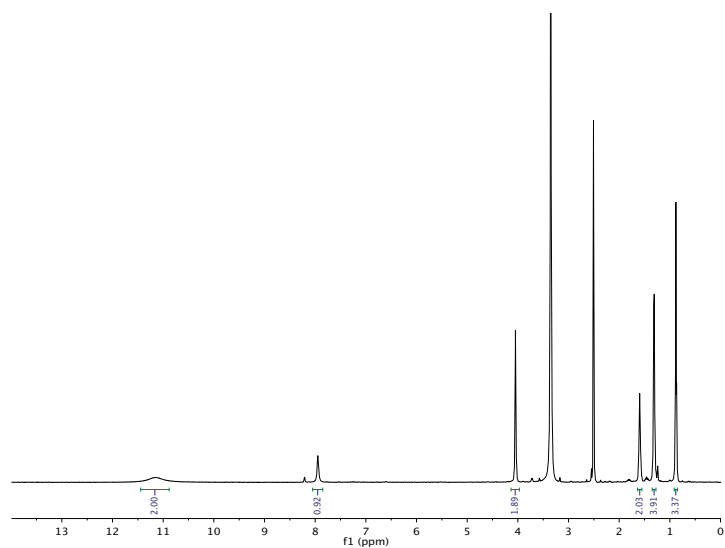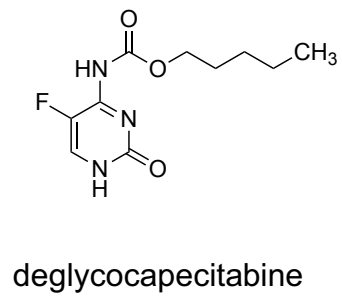

**Figure 1.** <sup>1</sup>H NMR spectra of capecitabine and purified deglyco capecitabine in DMSO-D<sub>6</sub>

### HR-MS/MS of deglycocepecitabine

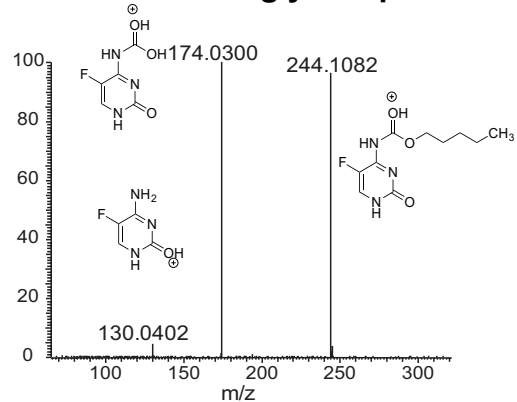

### HR-MS/MS of capecitabine

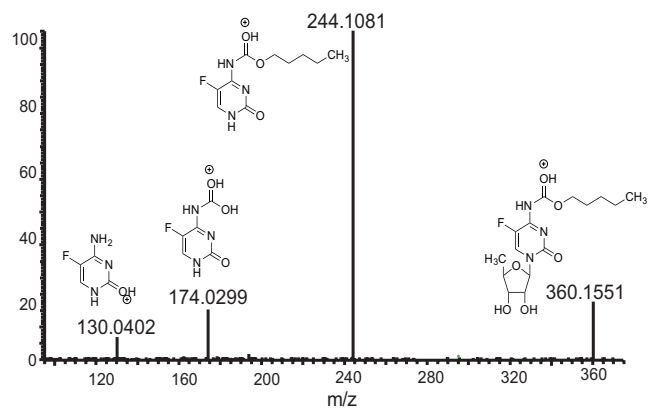

**Figure 2.** HR-MS/MS analysis of capecitabine and deglycocepecitabine (protonation position is arbitrary).

## B. Hydrocortisone and 20 $\beta$ -dihydrocortisone

The molecular formula of dihydrocortisone (C<sub>21</sub>H<sub>32</sub>O<sub>5</sub>) was deduced from HR-MS data (**Table S1**), implying a reduction to the parent molecule. To elucidate the structure of the metabolite and localize the position of this modification, we isolated pure dihydrocortisone using HPLC. <sup>13</sup>C-NMR, <sup>1</sup>H-NMR, and 2D-HSQC NMR spectra of dihydrocortisone were almost identical to those of hydrocortisone, except for: 1) The shift of the ketone carbon C-20 from chemical shift 211.7 ppm to 75.2 ppm, and the relocation of the methylene protons at C-21 from 4.08 and 4.51 ppm to 3.40 and 3.46 ppm, which resulted from the shielding effect of the hydroxyl group at C-20; and 2) The presence of a methine proton at C-20 at chemical shift 3.56 ppm (**Table 2 and Figures 3-5**). Altogether, the results confirmed the structure of the metabolite as 20-dihydrocortisone, which is derived from the ketone reduction of hydrocortisone. To determine the stereochemistry of the hydroxyl group at C-20, we compared our dihydrocortisone metabolite to authentic standards of 20 $\alpha$ -dihydrocortisone and 20 $\beta$ -dihydrocortisone using HPLC-HRMS following the same column, gradient, and analysis methods as for the donor runs. Our MDM metabolite had the same retention time as 20 $\beta$ -dihydrocortisone (**Figure 6**).

**Table 2.** <sup>1</sup>H NMR data for hydrocortisone and purified 20β-dihydrocortisone (500 MHz in DMSO-D6)

| Position                 | δH, mult (J in Hz)<br>Hydrocortisone | δC    | Position                 | δH, mult (J in Hz)<br>20-dihydrocortisone | δC    |
|--------------------------|--------------------------------------|-------|--------------------------|-------------------------------------------|-------|
| <b>1-CH<sub>2</sub></b>  | 2.43, m <sup>b</sup>                 | 31.4  | <b>1-CH<sub>2</sub></b>  | 1.32, 1.70                                | 33.2  |
| <b>2-CH<sub>2</sub></b>  | 2.57, t                              | 33.0  | <b>2-CH<sub>2</sub></b>  | 2.43, 2.19                                | 31.5  |
| <b>3</b>                 |                                      | 198.1 | <b>3</b>                 |                                           | 198.1 |
| <b>4-CH</b>              | 5.56, s                              | 121.5 | <b>4-CH</b>              | 5.55, s                                   | 121.4 |
| <b>5</b>                 |                                      | 172.4 | <b>5</b>                 |                                           | 172.8 |
| <b>6-CH<sub>2</sub></b>  | 2.41, 2.20, m <sup>b</sup>           | 33.5  | <b>6-CH<sub>2</sub></b>  | 2.18, 2.36                                | 33.5  |
| <b>7-CH<sub>2</sub></b>  | 1.65, 1.27, m <sup>b</sup>           | 23.4  | <b>7-CH<sub>2</sub></b>  |                                           | 23.8  |
| <b>8-CH</b>              | 1.65, dd                             | 51.6  | <b>8-CH</b>              | 1.5                                       | 50.3  |
| <b>9-CH</b>              | 1.91, m <sup>b</sup>                 | 31.2  | <b>9-CH</b>              | 1.87                                      | 31.3  |
| <b>10</b>                |                                      | 38.9  | <b>10</b>                |                                           | 38.9  |
| <b>11-CH</b>             | 4.26, m                              | 66.5  | <b>11-CH</b>             | 4.22, m                                   | 66.7  |
| <b>12-CH<sub>2</sub></b> | 1.88, 1.54, m <sup>b</sup>           | 39.1  | <b>12-CH<sub>2</sub></b> | 1.90, 1.63                                | 40.9  |
| <b>13</b>                |                                      | 46.4  | <b>13</b>                |                                           | 46.5  |
| <b>14-CH</b>             | 0.86, m                              | 55.6  | <b>14-CH</b>             | 0.83, m                                   | 55.8  |
| <b>15-CH<sub>2</sub></b> | 1.93, 0.99, m <sup>b</sup>           | 32.8  | <b>15-CH<sub>2</sub></b> | 1.92, 0.95                                | 33.0  |
| <b>16-CH<sub>2</sub></b> | 2.09, 1.79, m <sup>b</sup>           | 34.1  | <b>16-CH<sub>2</sub></b> | 2.10, 1.77                                | 34.1  |
| <b>17</b>                |                                      | 88.5  | <b>17</b>                |                                           | 84.1  |
| <b>18-CH<sub>3</sub></b> | 0.75, s                              | 17.0  | <b>18-CH<sub>3</sub></b> | 0.98                                      | 17.1  |
| <b>19-CH<sub>3</sub></b> | 1.37, s                              | 20.5  | <b>19-CH<sub>3</sub></b> | 1.38                                      | 20.5  |
| <b>20</b>                |                                      | 211.7 | <b>20-CH</b>             | 3.56, m <sup>b</sup>                      | 75.2  |
| <b>21-CH<sub>2</sub></b> | 4.51, 4.08, dd                       | 65.9  | <b>21-CH<sub>2</sub></b> | 3.45, 3.40, m <sup>b</sup>                | 63.8  |

<sup>b</sup> overlapped signal

\*ND: Not Detected

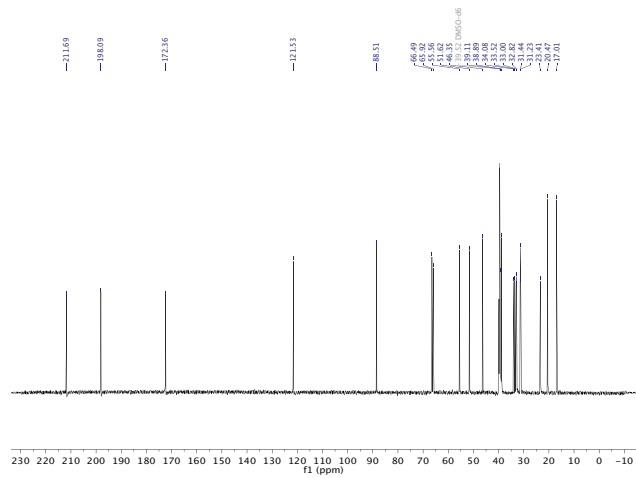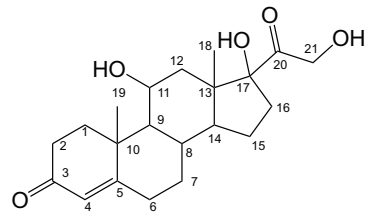

hydrocortisone

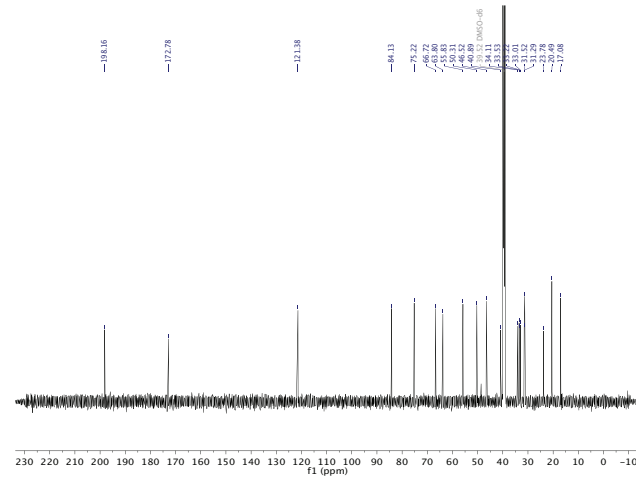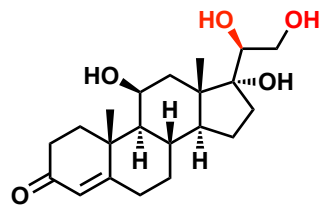

20 $\beta$  -dihydrocortisone

**Figure 3.**  $^{13}\text{C}$  NMR spectra of hydrocortisone and purified 20 $\beta$ -dihydrocortisone in DMSO-D $_6$

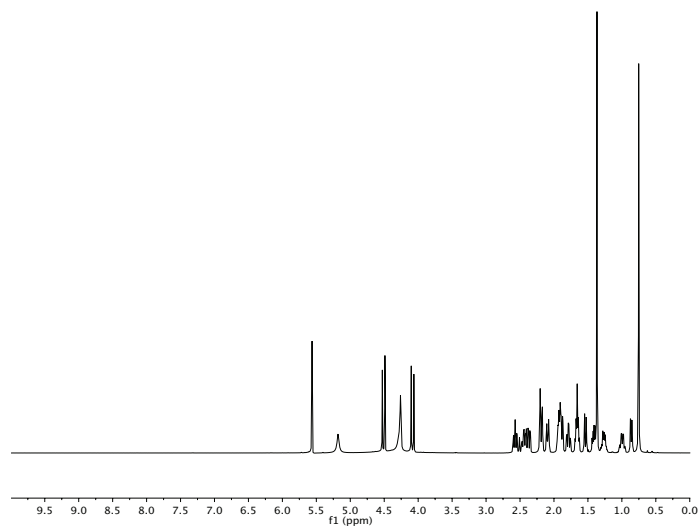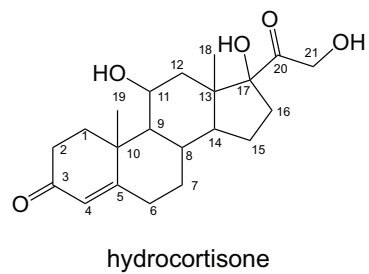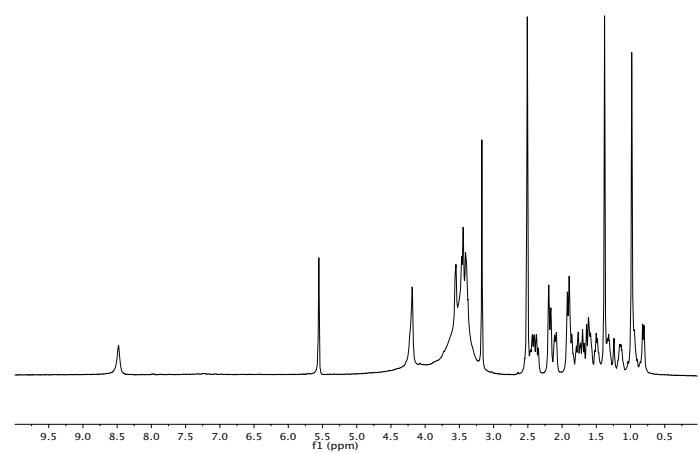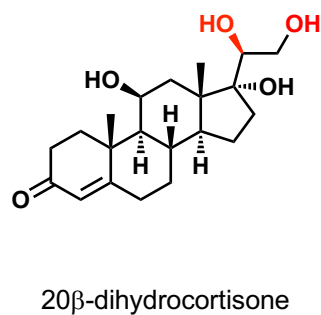

**Figure 4.**  $^1\text{H}$  NMR spectra of hydrocortisone and purified 20 $\beta$ -dihydrocortisone in DMSO-D<sub>6</sub>



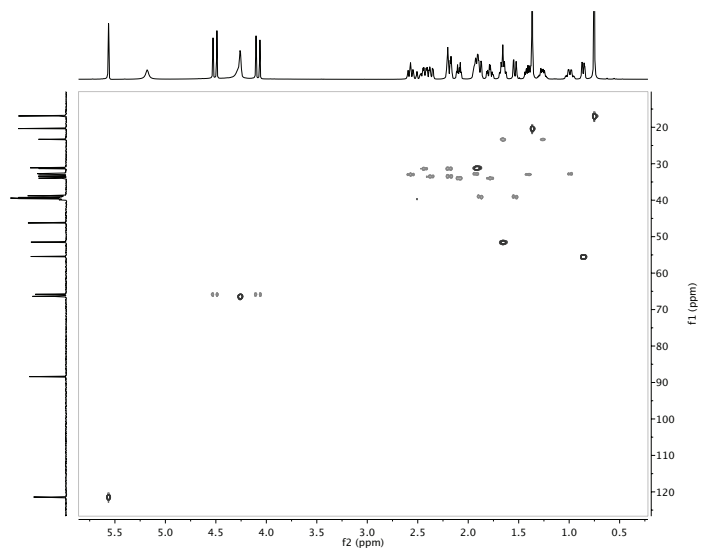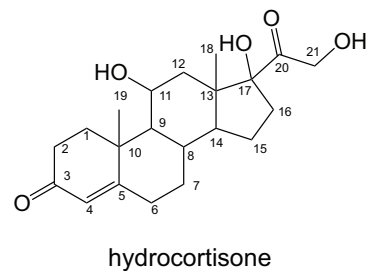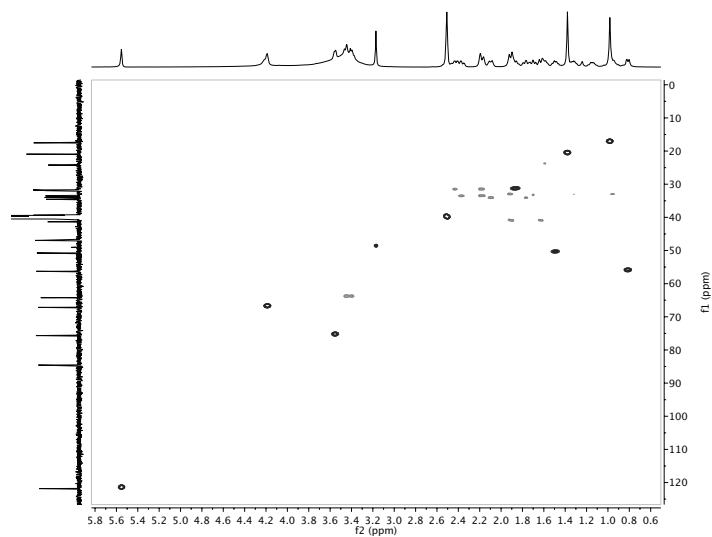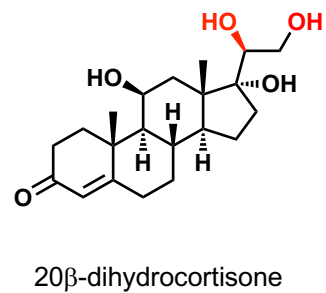

**Figure 5.** HSQC spectra of hydrocortisone and purified 20 $\beta$ -dihydrocortisone in DMSO-D6

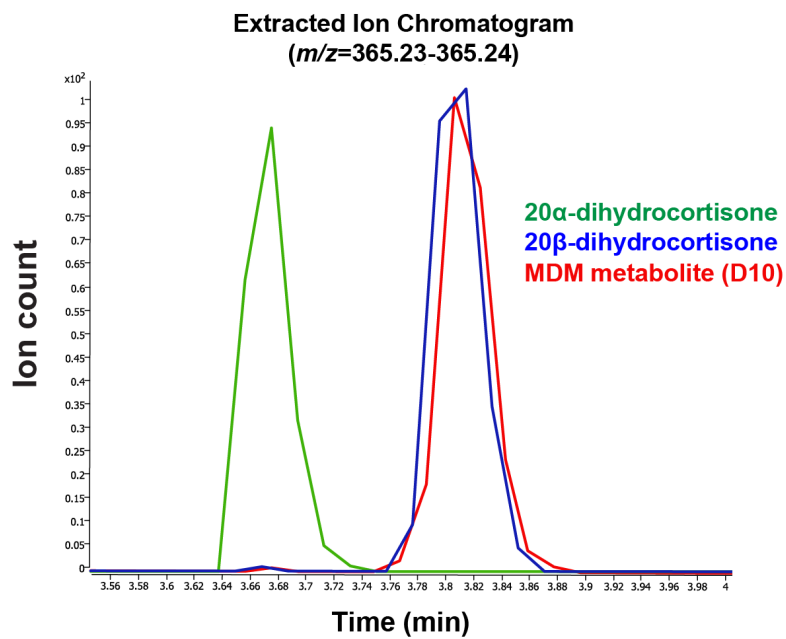

**Figure 6.** HPLC-HRMS analysis of the MDM metabolite of hydrocortisone in comparison to authentic standards of 20 $\alpha$ -dihydrocortisone and 20 $\beta$ -dihydrocortisone.

### C. Tolcapone and *N*-acetylamino-tolcapone

The tolcapone metabolite was purified and its structure was elucidated using 1D and 2D NMR analyses.

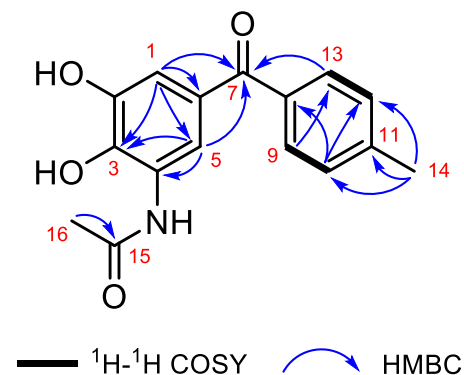

**Figure 7.**  $^1\text{H}$ - $^1\text{H}$  COSY, key HMBC correlations of purified *N*-acetylamino-tolcapone.

**Table 3.**  $^1\text{H}$  and  $^{13}\text{C}$  NMR data ( $\delta$  in ppm,  $J$  in Hz) for *N*-acetylamino-tolcapone in MeOD.

| No. | <i>N</i> -acetylamino-tolcapone <sup>a</sup> |                          |
|-----|----------------------------------------------|--------------------------|
|     | $\delta_{\text{H}}$ (mult)                   | $\delta_{\text{C}}$ type |
| 1   | 7.66 brs                                     | 119.0 CH                 |
| 2   | –                                            | – <sup>b</sup> qC        |
| 3   | –                                            | 143.3 qC                 |
| 4   | –                                            | 147.1 qC                 |
| 5   | 7.18 s                                       | 114.2 CH                 |
| 6   | –                                            | 126.8 qC                 |
| 7   | –                                            | 197.5 qC                 |
| 8   | –                                            | 136.7 qC                 |
| 9   | 7.67 brs                                     | 131.0 CH                 |
| 10  | 7.35 s                                       | 129.9 CH                 |
| 11  | –                                            | 144.2 qC                 |
| 12  | 7.35 s                                       | 129.9 CH                 |
| 13  | 7.67 brs                                     | 131.0 CH                 |
| 14  | 2.45 s                                       | 21.6 CH <sub>3</sub>     |
| 15  | –                                            | 172.6 qC                 |
| 16  | 2.20 s                                       | 23.4 CH <sub>3</sub>     |

<sup>a</sup> Recorded at 500 MHz and 125 MHz for  $^1\text{H}$  and  $^{13}\text{C}$  NMR, respectively, in MeOD, chemical shifts (ppm) referred to MeOH ( $\delta_{\text{H}}$  3.31,  $\delta_{\text{C}}$  49.0). <sup>b</sup> not detected. Assignments were deduced by analysis of 1D and 2D NMR spectra.

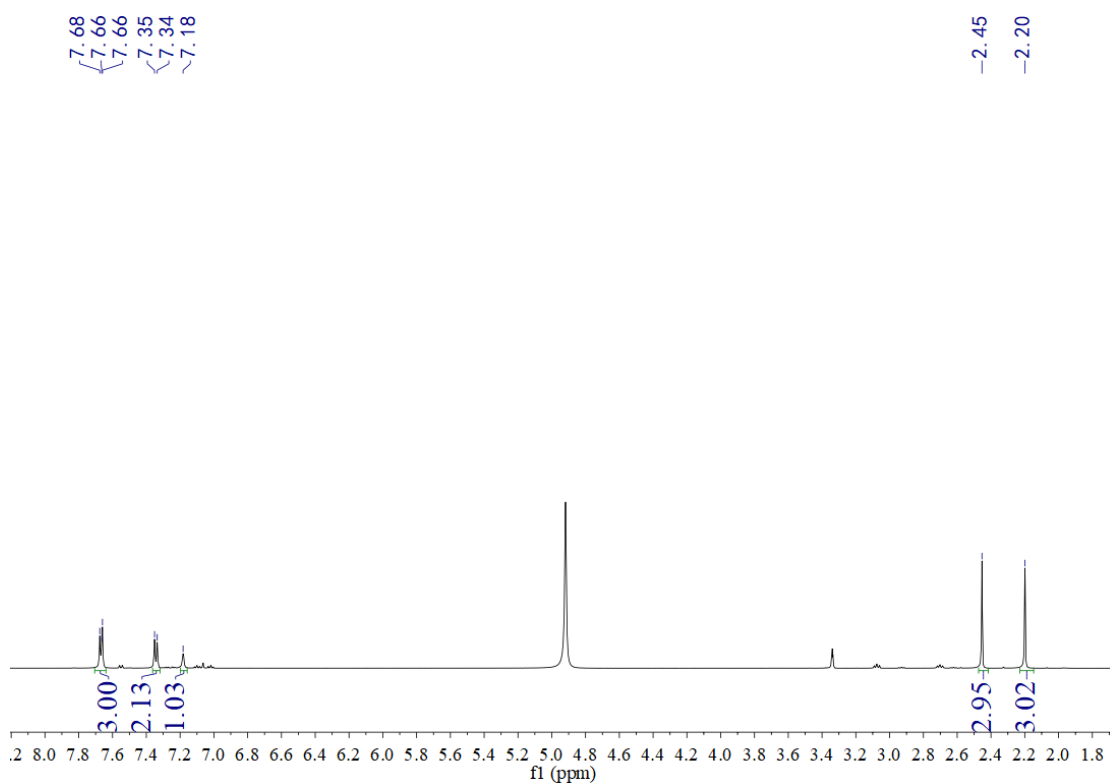

**Figure 8.**  $^1\text{H}$  NMR spectrum (500 MHz) of purified *N*-acetylamino-tolcapone in MeOD.

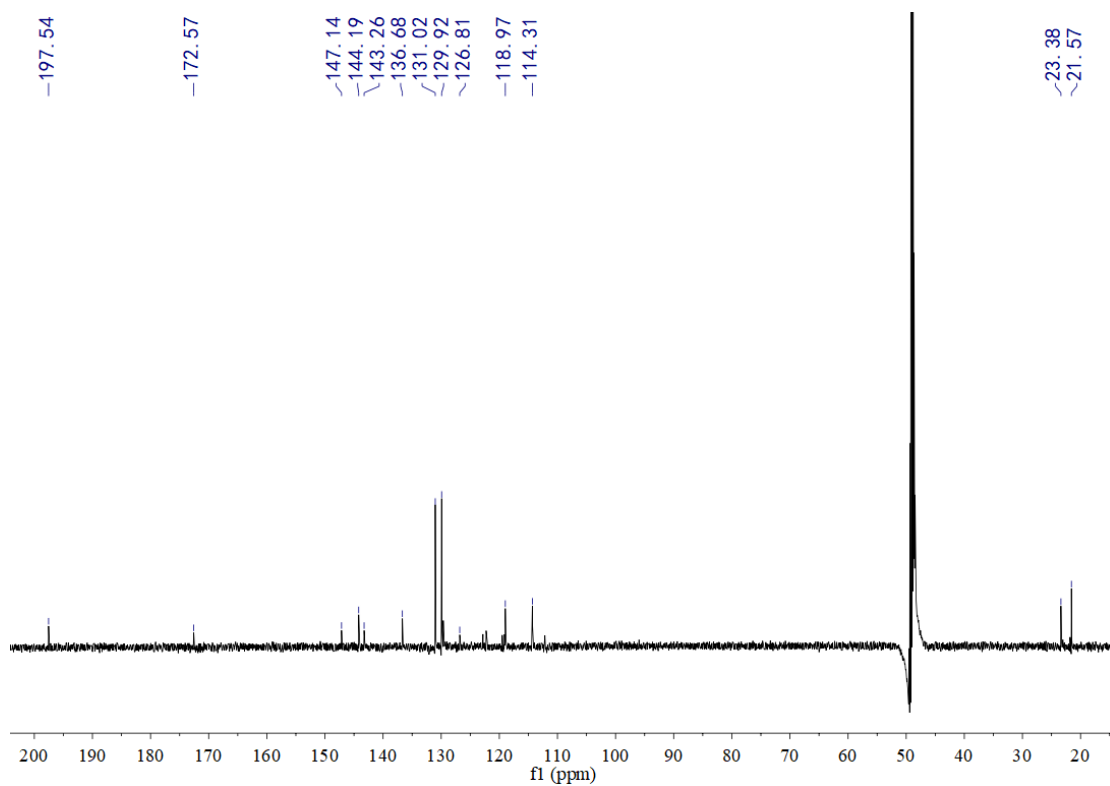

**Figure 9.**  $^{13}\text{C}$  NMR spectrum (125 MHz) of purified *N*-acetylamino-tolcapone in MeOD.

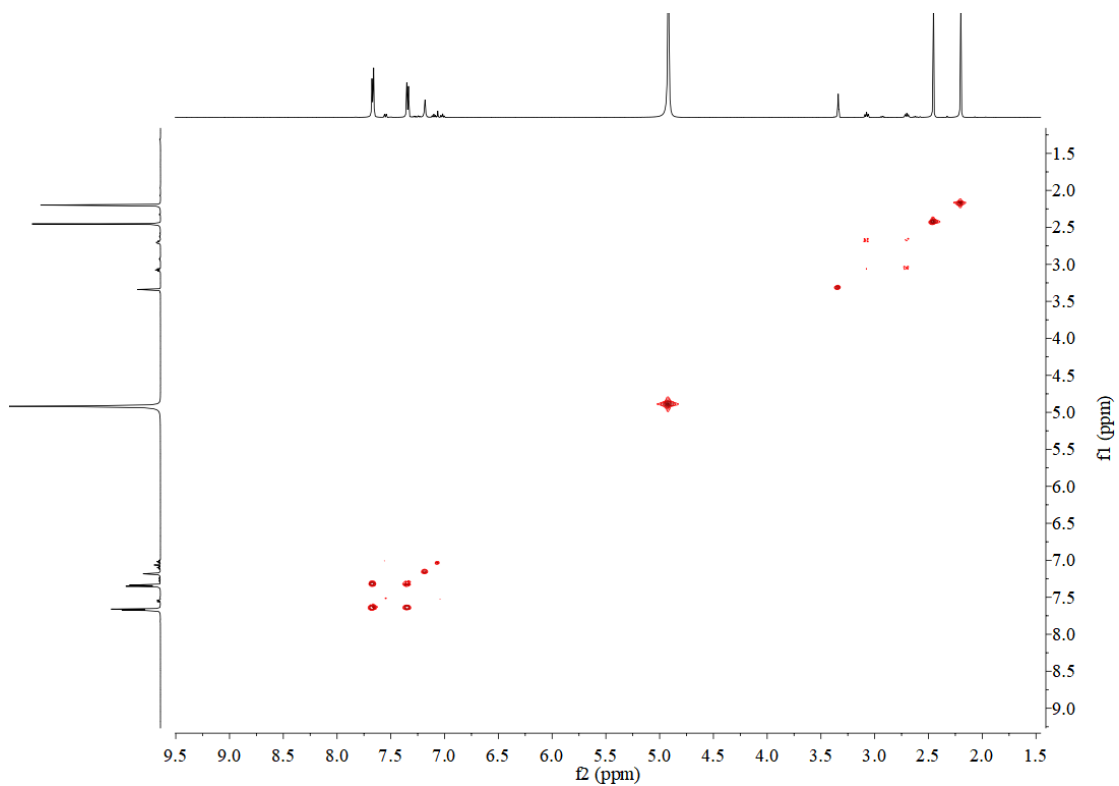

**Figure 10.**  $^1\text{H}$ - $^1\text{H}$  COSY spectrum (500 MHz) of purified *N*-acetylamino-tolcapone in MeOD.

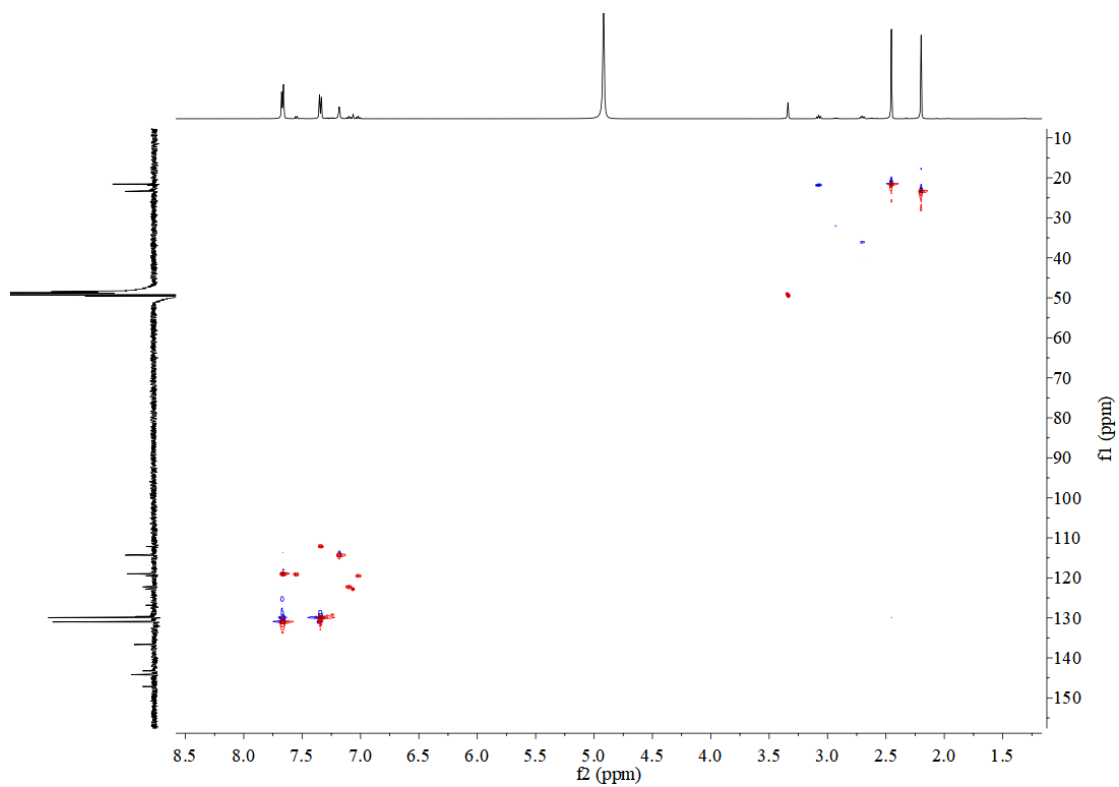

**Figure 11.** HSQC spectrum (500 MHz) of purified *N*-acetylamino-tolcapone in MeOD.

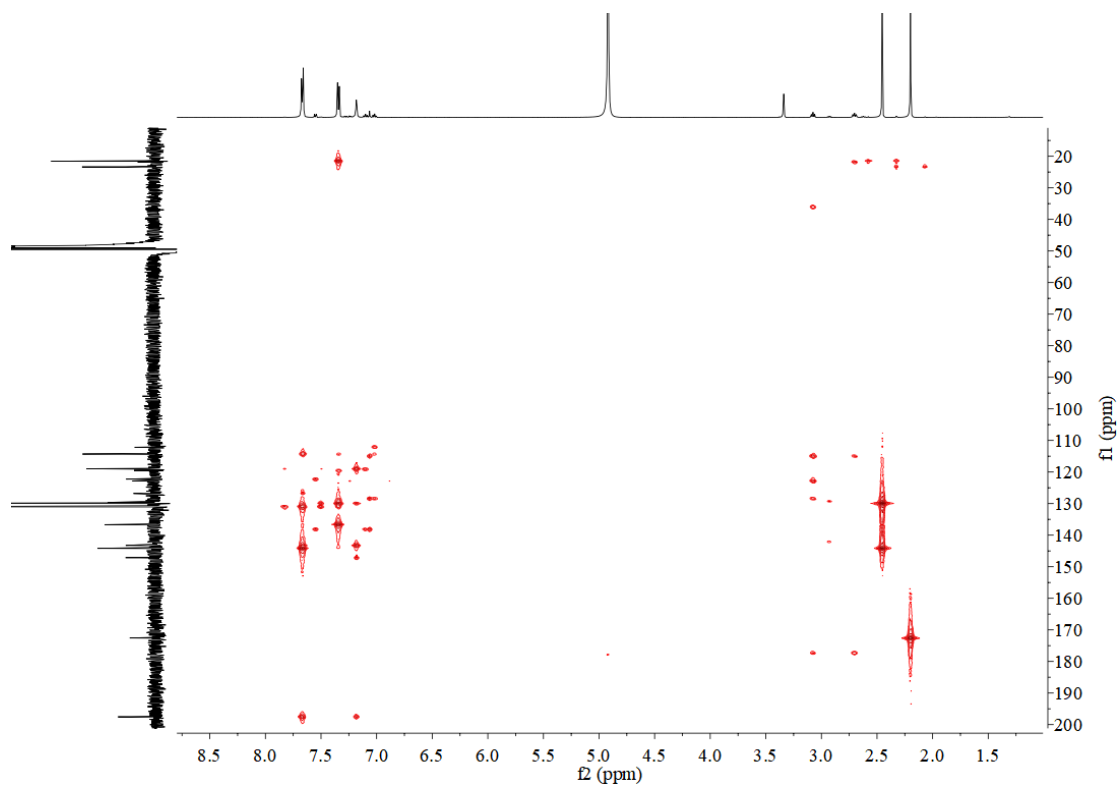

**Figure 12.** HMBC spectrum (500 MHz) of purified *N*-acetylamino-tolcapone in MeOD.

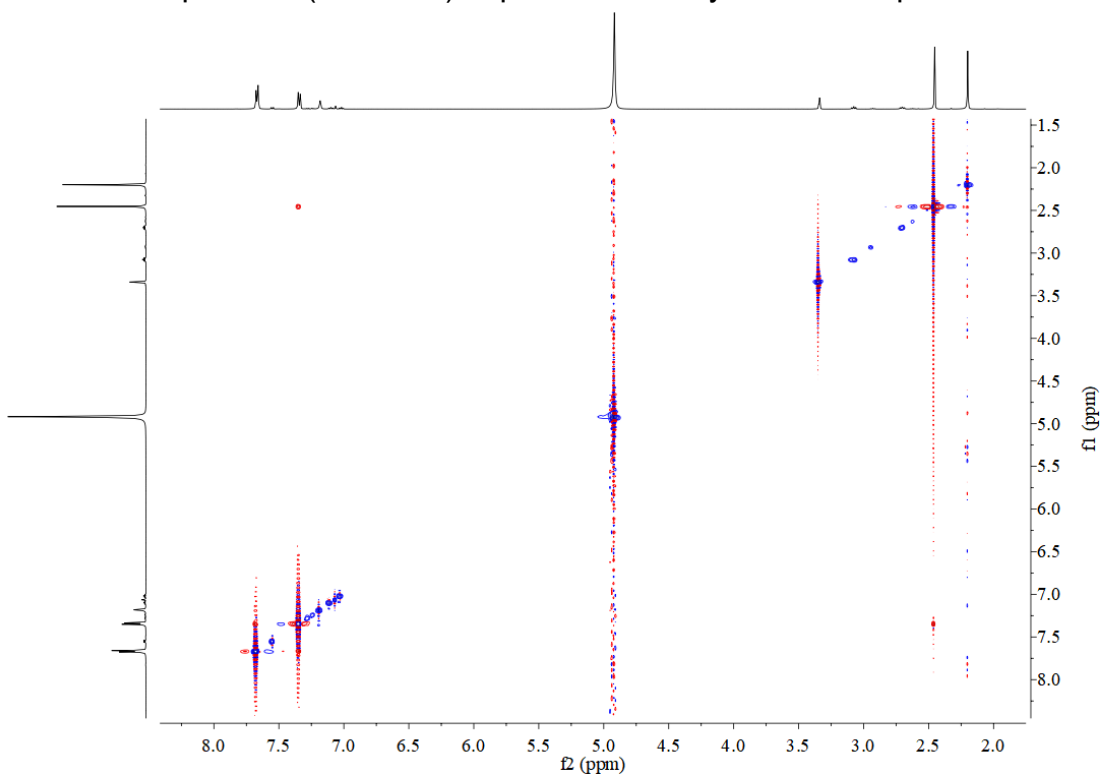

**Figure 13.** NOESY spectrum (500 MHz) of purified *N*-acetylamino-tolcapone in MeOD.

## D. Misoprostol and misoprostol acid

The misoprostol metabolite was purified and its structure was elucidated using 1D and 2D NMR analyses.

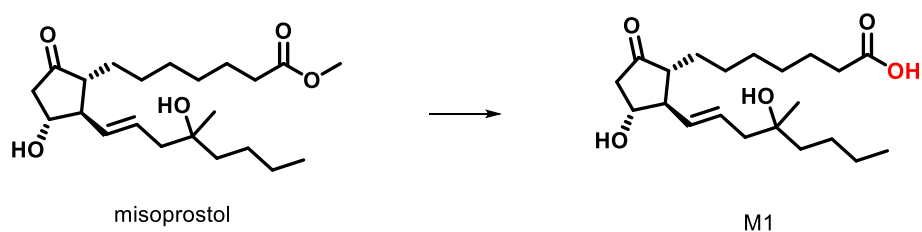

**Figure 14.** Misoprostol metabolism into misoprostol acid.

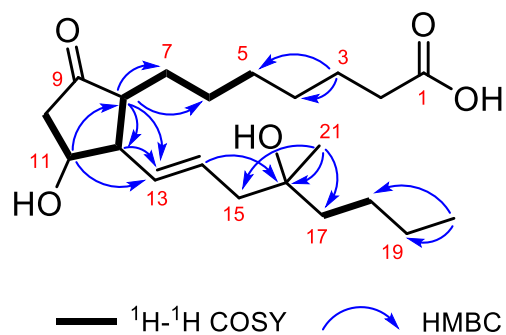

**Figure 15.**  $^1\text{H}$ - $^1\text{H}$  COSY, key HMBC correlations of purified misoprostol acid.

**Table 4.**  $^1\text{H}$  and  $^{13}\text{C}$  NMR data ( $\delta$  in ppm,  $J$  in Hz) for purified misoprostol acid in MeOD.

| No. | <b>M1</b> <sup>a</sup>     |                          |
|-----|----------------------------|--------------------------|
|     | $\delta_{\text{H}}$ (mult) | $\delta_{\text{C}}$ type |
| 1   | –                          | 168.8 qC                 |
| 2   | 1.45 m                     | 42.0 CH <sub>2</sub>     |
| 3   | 1.58 <sup>b</sup> m        | 26.2 CH <sub>2</sub>     |
| 4   | 1.33 <sup>b</sup> m        | 30.1 CH <sub>2</sub>     |
| 5   | 1.33 <sup>b</sup> m        | 30.6 CH <sub>2</sub>     |
| 6   | 1.58 <sup>b</sup> m        | 28.6 CH <sub>2</sub>     |
| 7   | 1.33 <sup>b</sup> m        | 27.7 CH <sub>2</sub>     |
| 8   | 2.07 m                     | 55.7 CH                  |
| 9   | –                          | 217.9 qC                 |
| 10  | 2.11 m, 2.68 m             | 47.4 CH <sub>2</sub>     |
| 11  | 4.05 td (9.0, 7.5)         | 72.9 CH                  |
| 12  | 2.35 m                     | 55.5 CH                  |
| 13  | 5.47 m                     | 134.5 CH                 |
| 14  | 5.68 m                     | 130.5 CH                 |
| 15  | 2.24 m                     | 46.0 CH <sub>2</sub>     |
| 16  | –                          | 73.3 qC                  |
| 17  | 1.47 m                     | 42.6 CH <sub>2</sub>     |
| 18  | 1.37 m                     | 27.0 CH <sub>2</sub>     |
| 19  | 1.35 m                     | 24.5 CH <sub>2</sub>     |
| 20  | 0.93 t (7.0)               | 14.5 CH <sub>3</sub>     |
| 21  | 1.15 s                     | 26.7 CH <sub>3</sub>     |

<sup>a</sup> Recorded at 500 MHz and 125 MHz for  $^1\text{H}$  and  $^{13}\text{C}$  NMR, respectively, in MeOD, chemical shifts (ppm) referred to MeOH ( $\delta_{\text{H}}$  3.31,  $\delta_{\text{C}}$  49.0). <sup>b</sup> overlapped. Assignments were deduced by analysis of 1D and 2D NMR spectra.



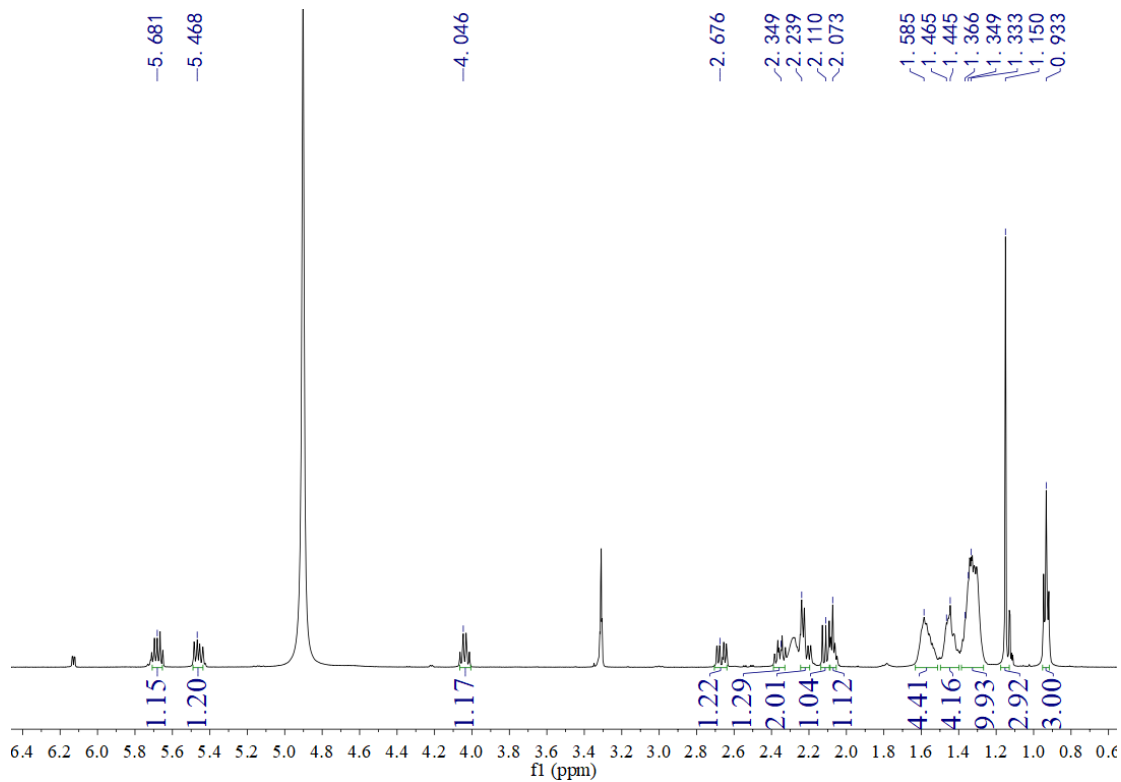

Figure 16. <sup>1</sup>H NMR spectrum (500 MHz) of purified misoprostol acid in MeOD.

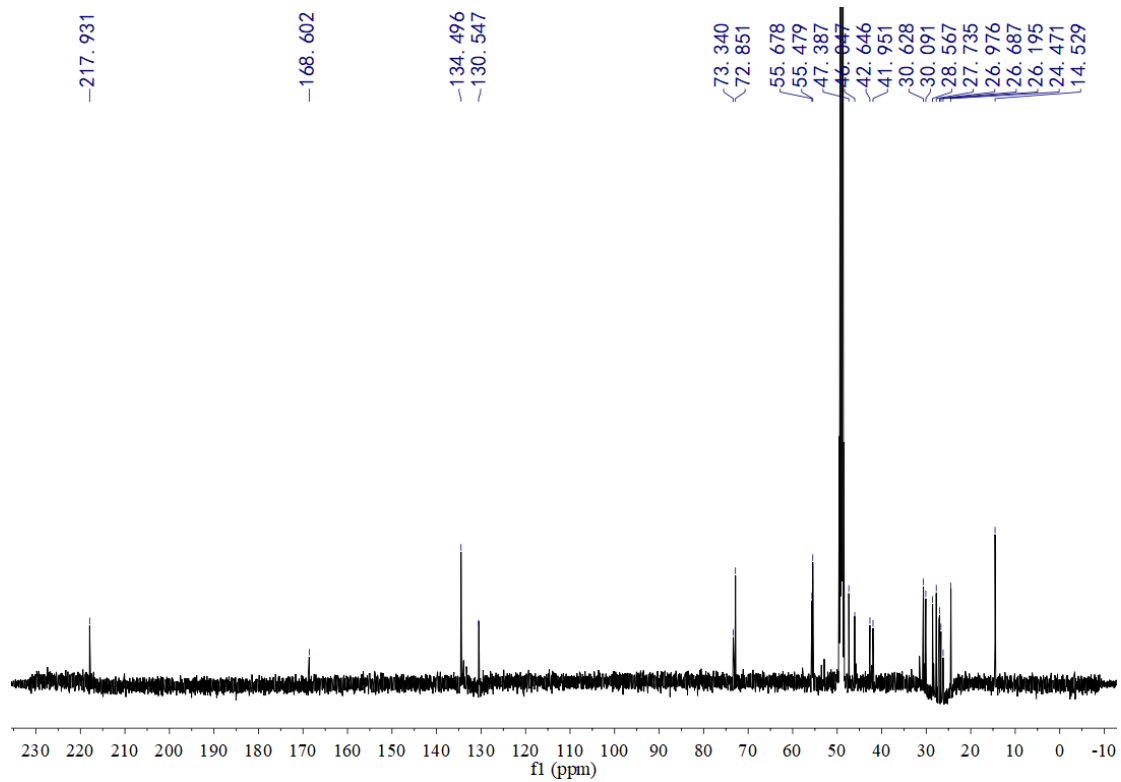

Figure 17. <sup>13</sup>C NMR spectrum (125 MHz) of purified misoprostol acid in MeOD.

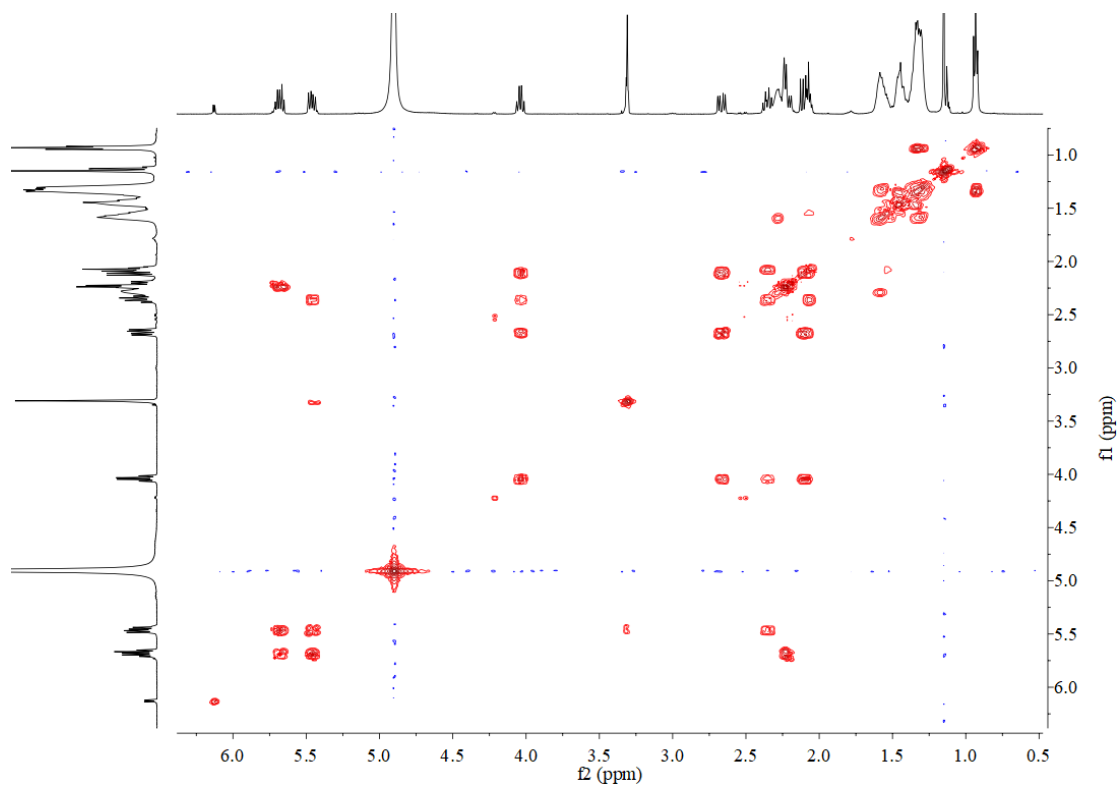

**Figure 18.**  $^1\text{H}$ - $^1\text{H}$  COSY spectrum (500 MHz) of purified misoprostol acid in MeOD.

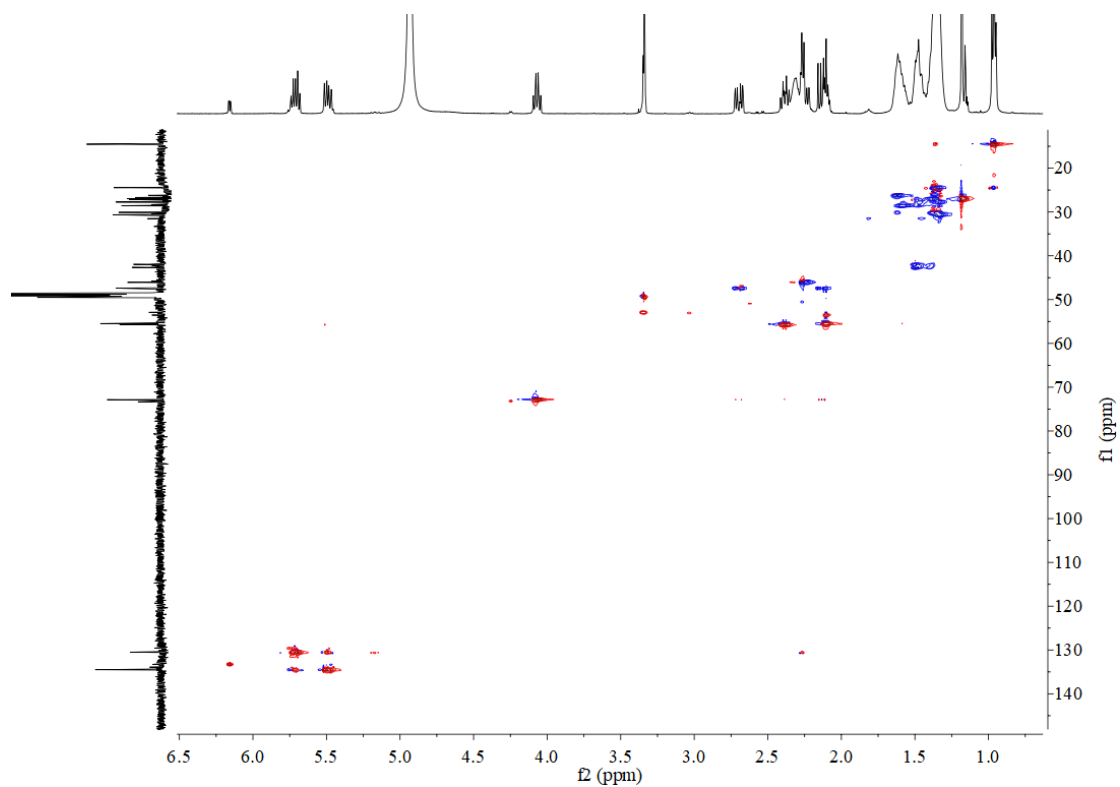

**Figure 19.** HSQC spectrum (500 MHz) of purified misoprostol acid in MeOD.

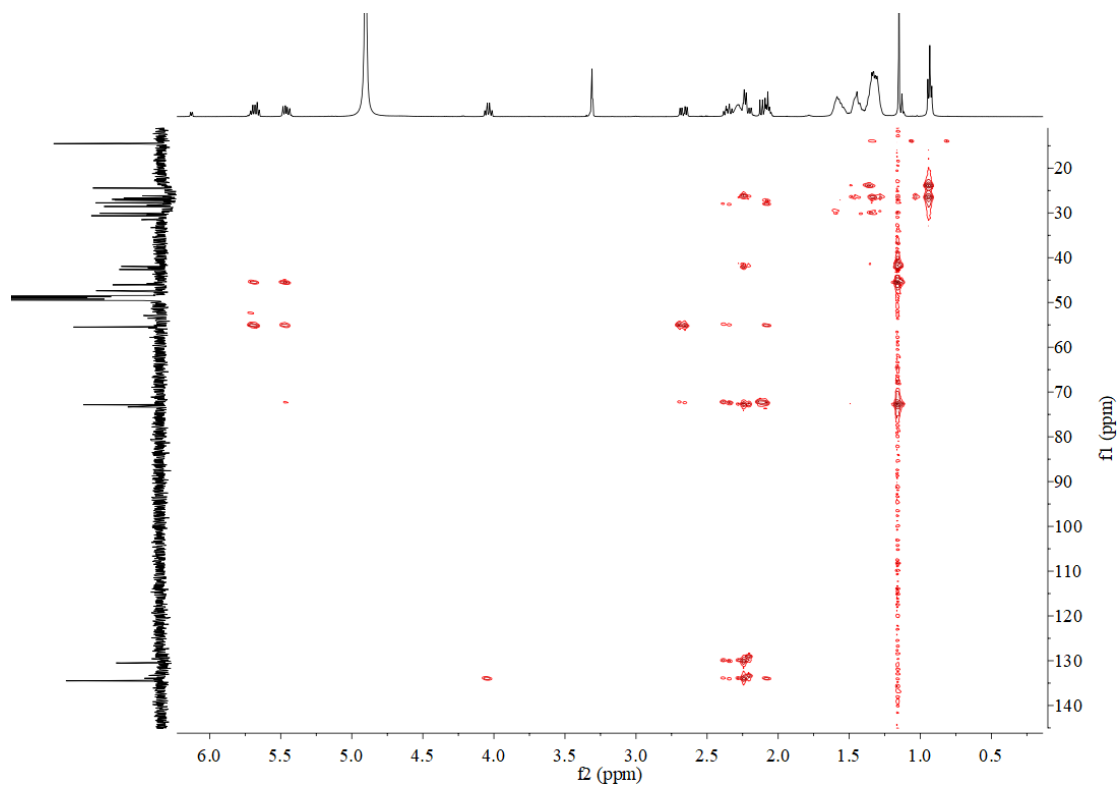

**Figure 20.** HMBC spectrum (500 MHz) of purified misoprostol acid in MeOD.

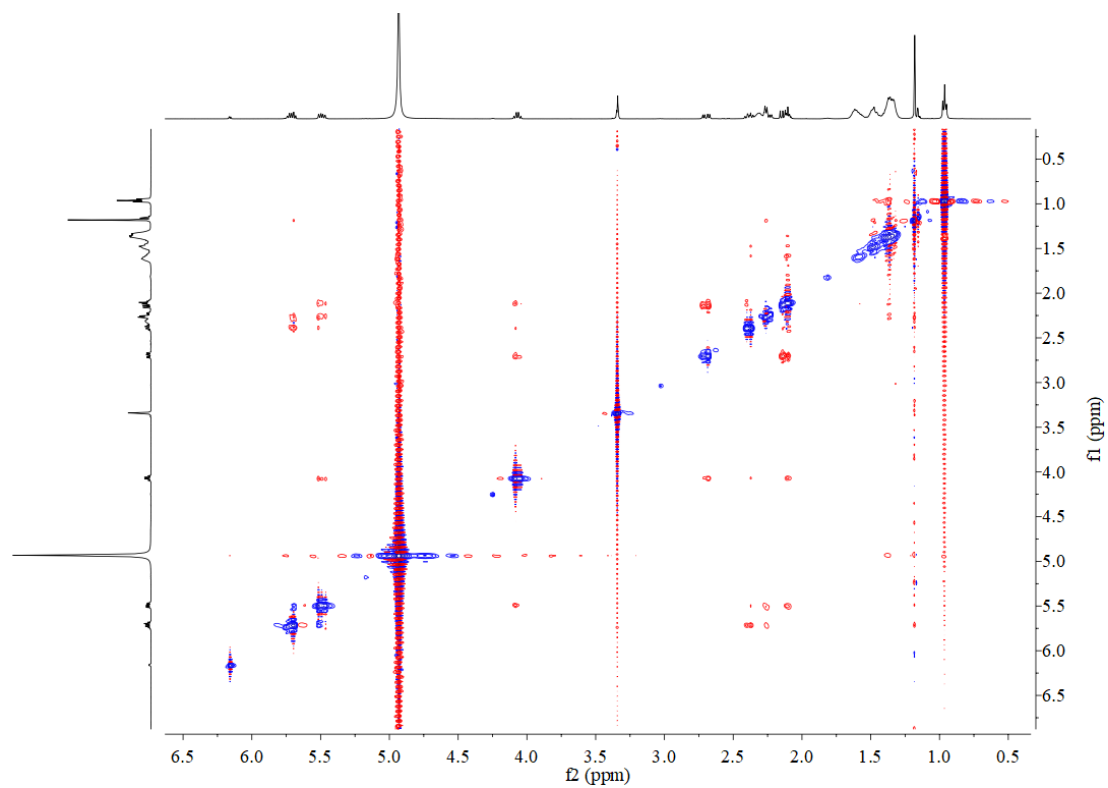

**Figure 21.** NOESY spectrum (500 MHz) of purified misoprostol acid in MeOD.

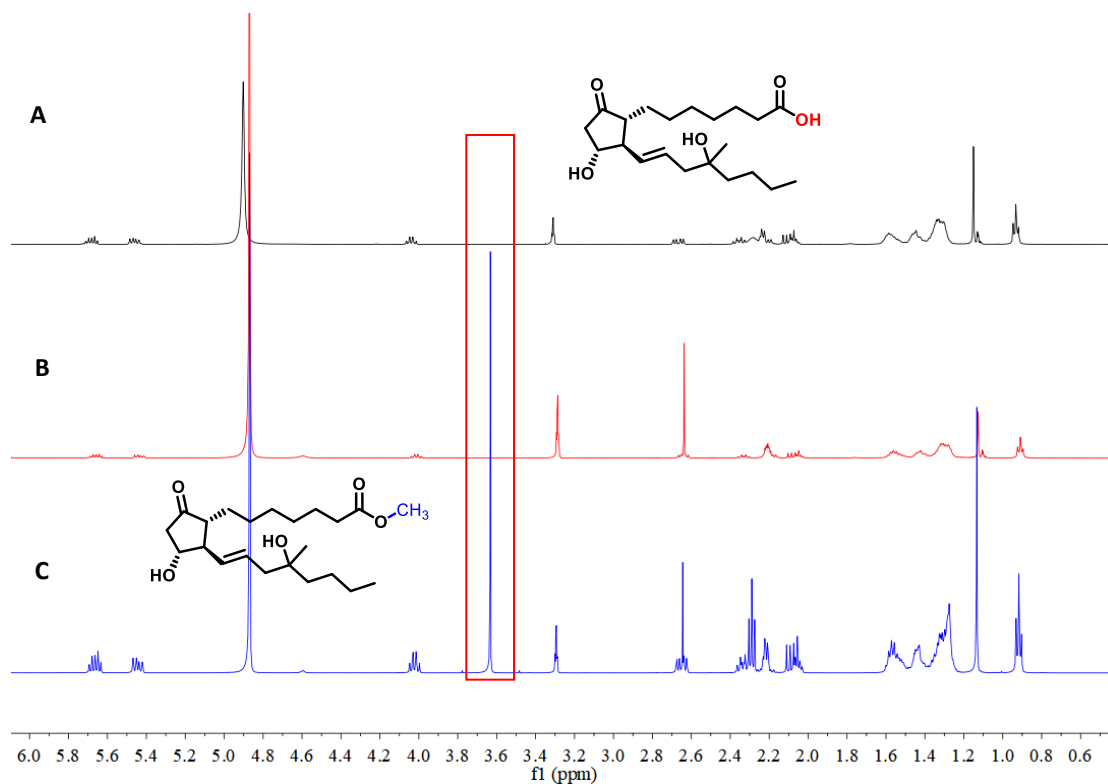

**Figure 22.** <sup>1</sup>H NMR spectrum (500 MHz) comparison between purified misoprostol acid (A), misoprostol free acid authentic standard (B), and misoprostol (C) in MeOD.

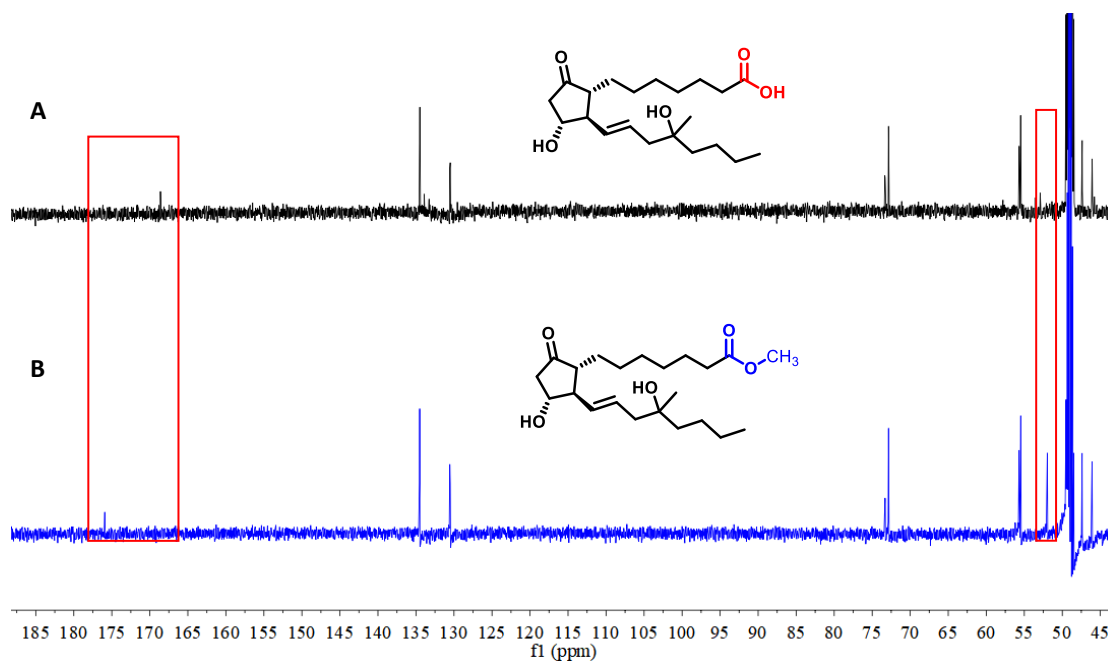

**Figure 23.** <sup>13</sup>C NMR spectrum (125 MHz) comparison between purified misoprostol acid (A) and misoprostol (B) in MeOD.

## E. Mycophenolate mofetil and mycophenolic acid

The mycophenolate mofetil metabolite was determined to be mycophenolic acid by comparison to an authentic standard of mycophenolic acid using HPLC-HRMS/MS analysis following the same column, gradient, and analysis methods as for the donor runs (**Figures 24-26**). Isolated mycophenolic acid from *ex vivo* incubations of the PD microbiome with mycophenolate mofetil has the same retention time, accurate mass, and HRMS/MS fragmentation pattern as the authentic standard of mycophenolic acid.

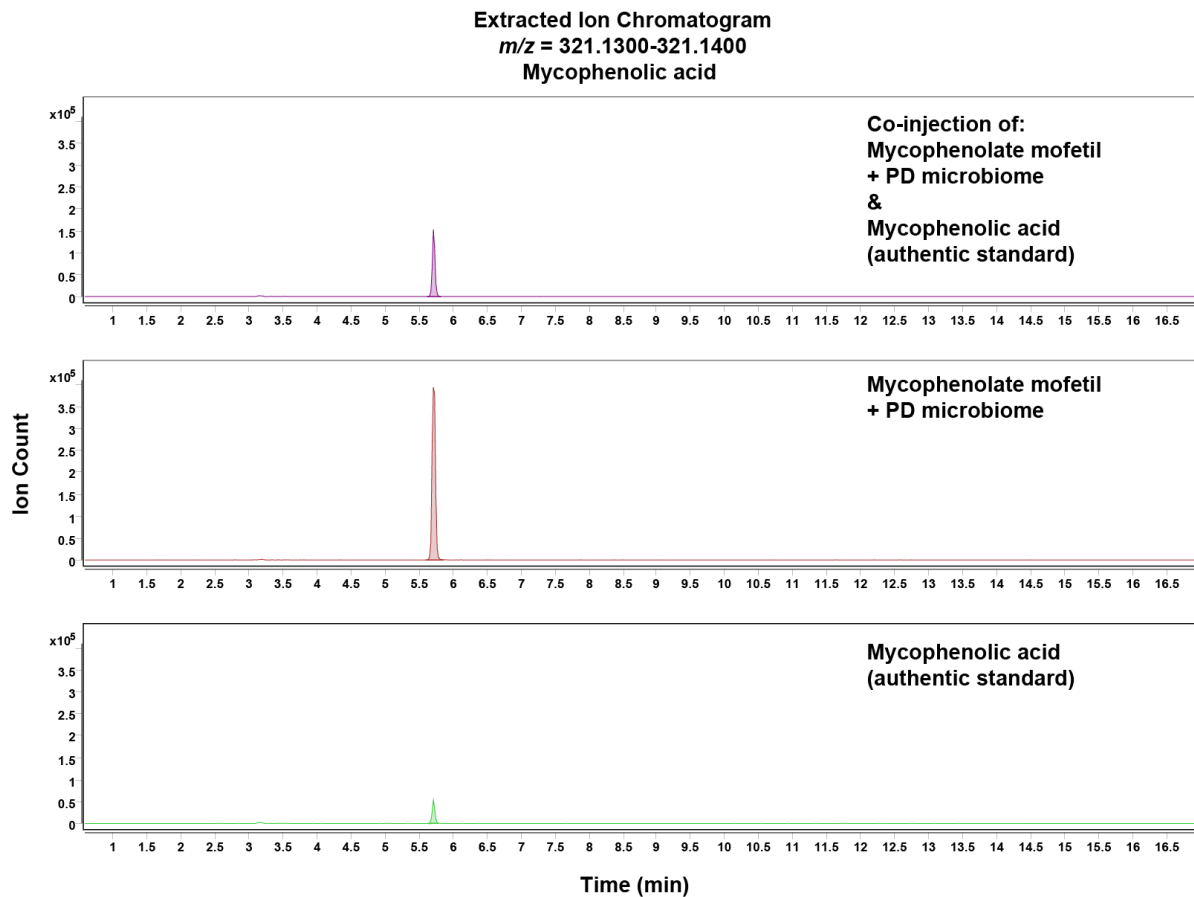

**Figure 24.** HPLC-HRMS analysis (Extracted Ion Chromatogram) of mycophenolic acid isolated from *ex vivo* incubations of the PD microbiome with mycophenolate mofetil, an authentic standard of mycophenolic acid, and a co-injection of both samples.

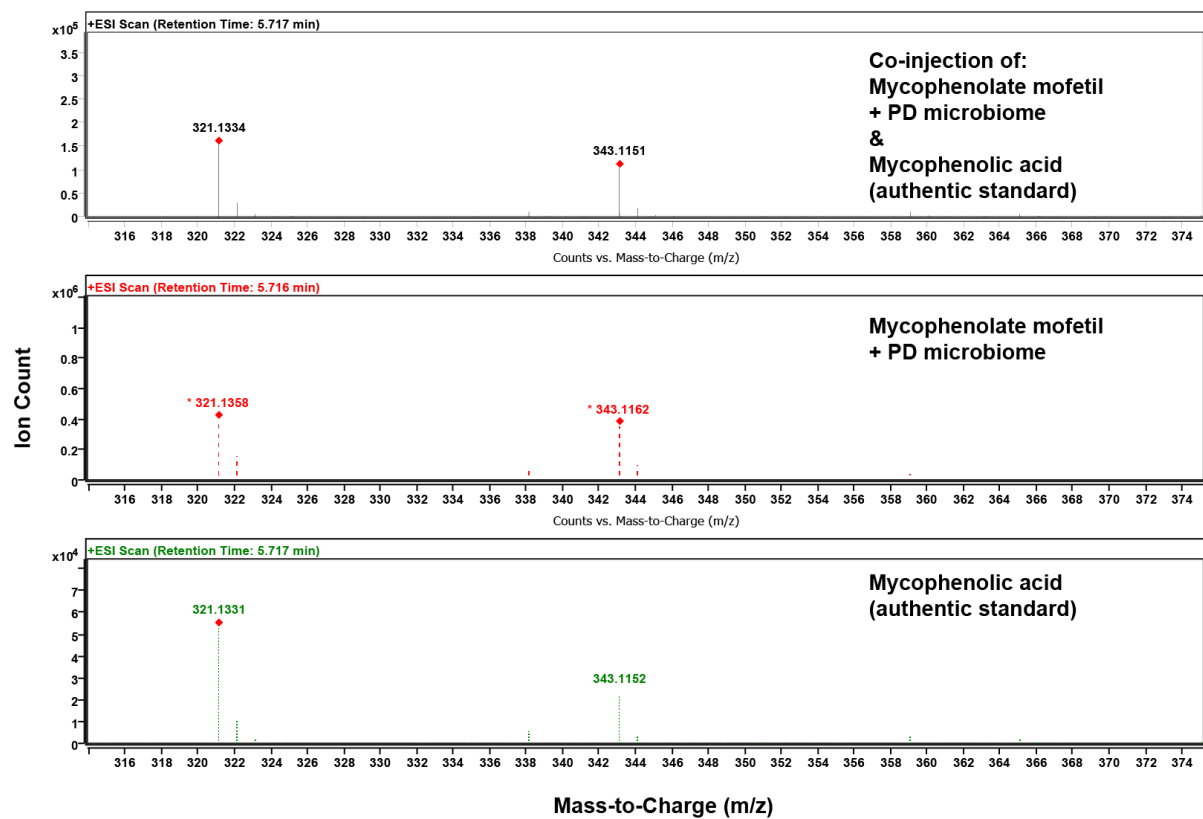

**Figure 25.** HPLC-HRMS analysis (Mass Spectrum) of mycophenolic acid isolated from *ex vivo* incubations of the PD microbiome with mycophenolate mofetil, an authentic standard of mycophenolic acid, and a co-injection of both samples.

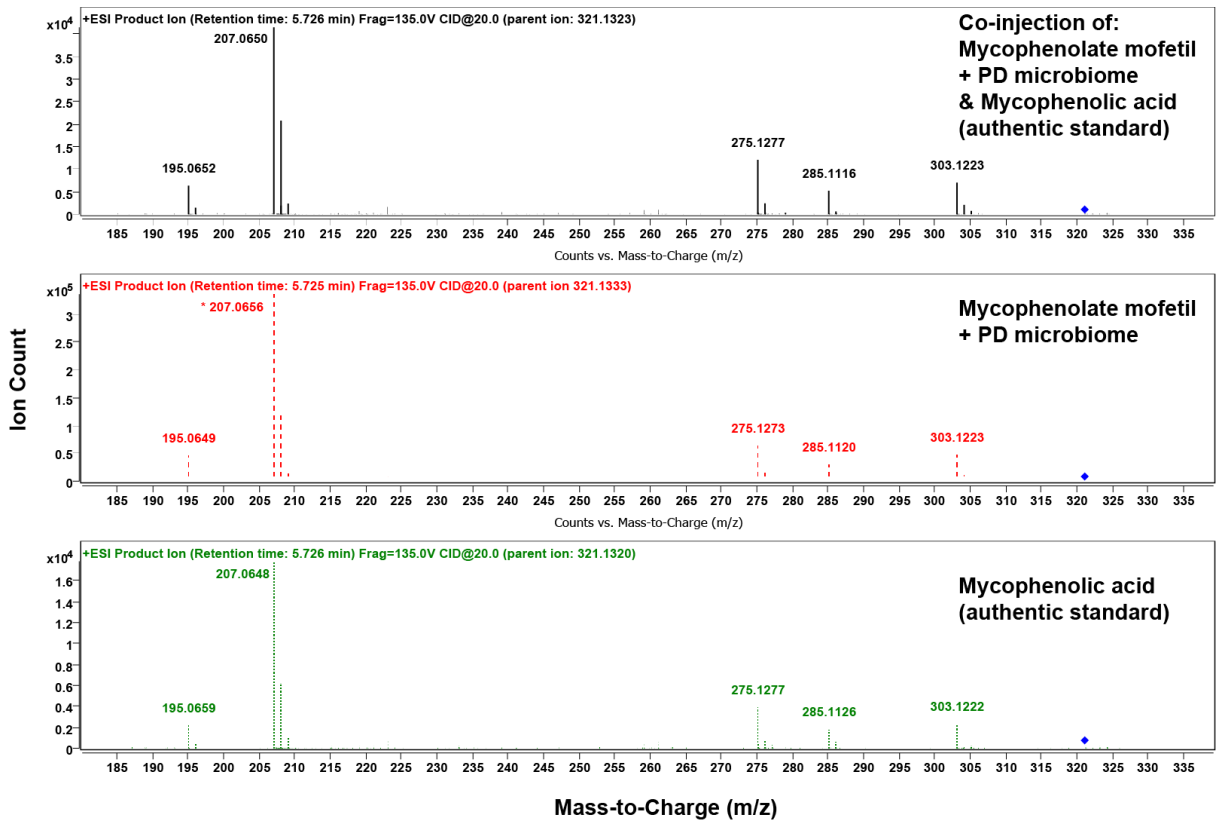

**Figure 26.** HPLC-HRMS/MS analysis (MS/MS Spectrum) of mycophenolic acid isolated from *ex vivo* incubations of the PD microbiome with mycophenolate mofetil, an authentic standard of mycophenolic acid, and a co-injection of both samples.

## F. Spironolactone and 7 $\alpha$ -thiospironolactone

The spironolactone metabolite was determined to be 7 $\alpha$ -thiospironolactone by comparison to an authentic standard of 7 $\alpha$ -thiospironolactone using HPLC-HRMS/MS analysis following the same column, gradient, and analysis methods as for the donor runs (**Figures 27-29**). Isolated 7 $\alpha$ -thiospironolactone from *ex vivo* incubations of the PD microbiome with spironolactone has the same retention time, accurate mass, and HRMS/MS fragmentation pattern as the authentic standard of 7 $\alpha$ -thiospironolactone.

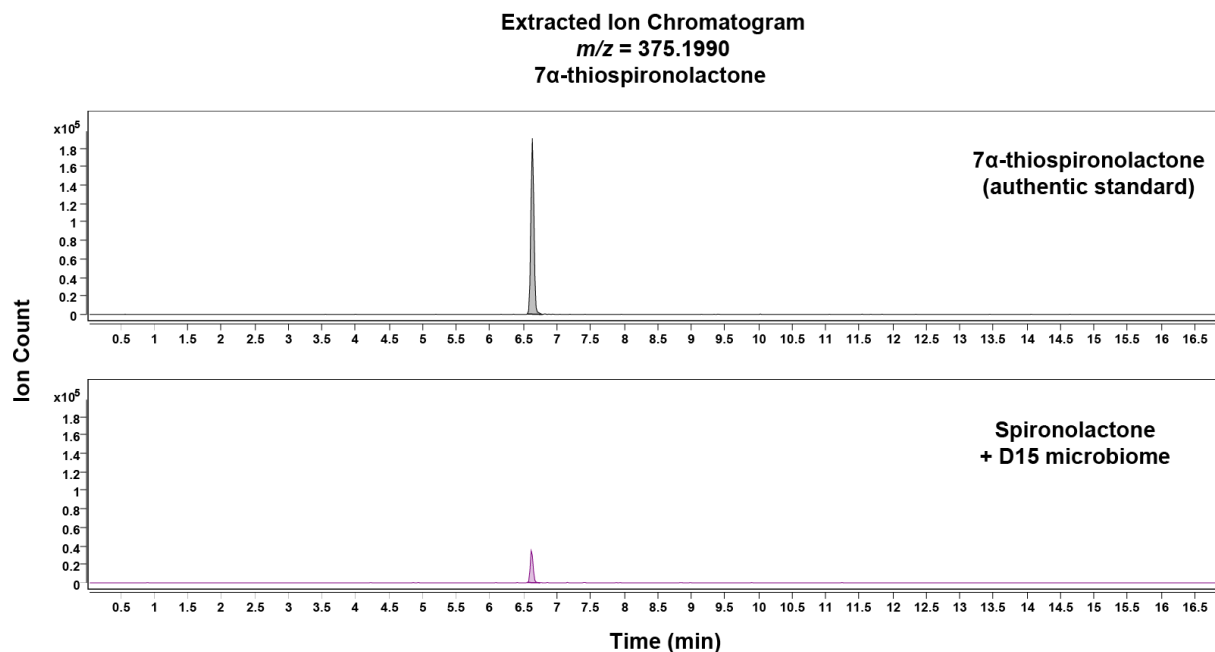

**Figure 27.** HPLC-HRMS analysis (Extracted Ion Chromatogram) of 7 $\alpha$ -thiospironolactone isolated from *ex vivo* incubations of the D15 microbiome with spironolactone and an authentic standard of 7 $\alpha$ -thiospironolactone, showing that they elute at the same retention time.



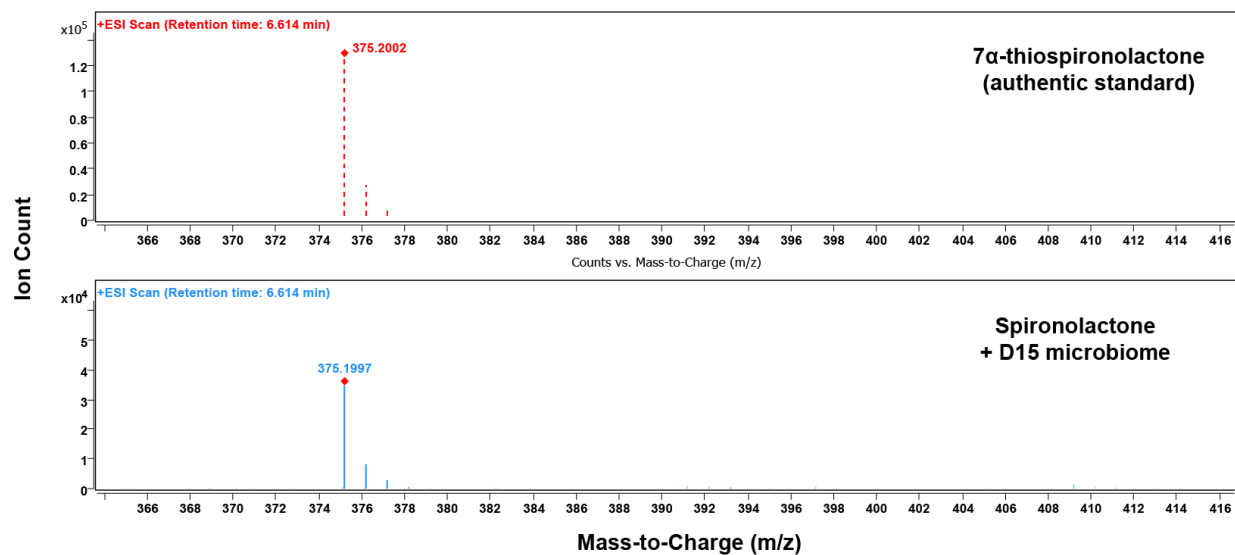

**Figure 28.** HPLC-HRMS analysis (MS spectrum) of 7 $\alpha$ -thiospironolactone isolated from *ex vivo* incubations of the D15 microbiome with spironolactone and an authentic standard of 7 $\alpha$ -thiospironolactone.

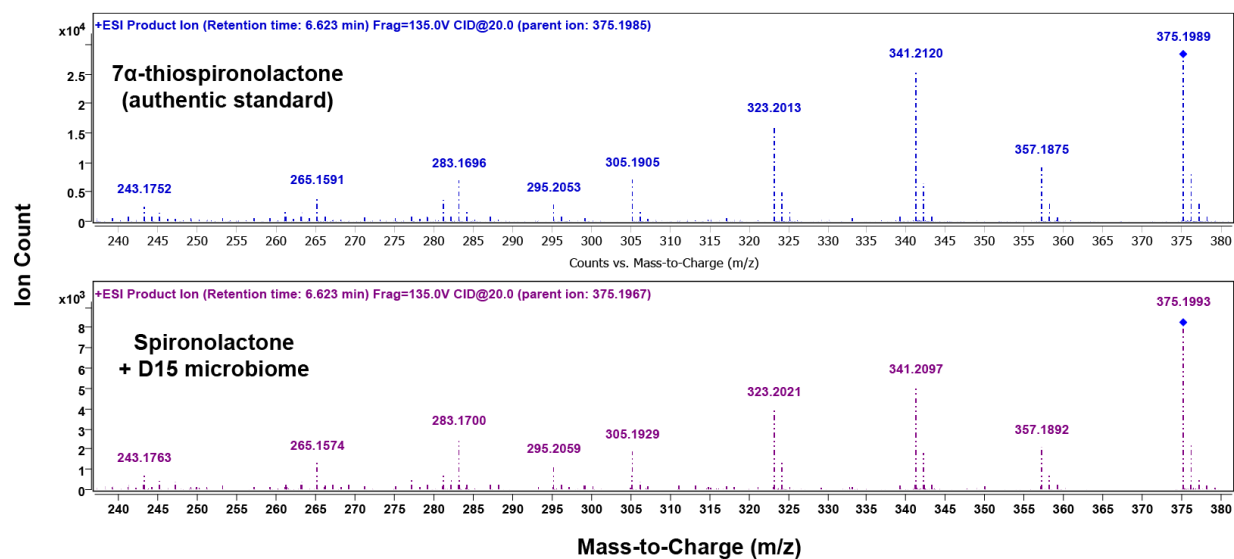

**Figure 29.** HPLC-HRMS analysis (MS/MS spectrum) of 7 $\alpha$ -thiospirolactone isolated from *ex vivo* incubations of the D15 microbiome with spirocholactone and an authentic standard of 7 $\alpha$ -thiospirolactone.
