# Supplementary material
Source: PubMed Central journal article supplement (PMC8591631)

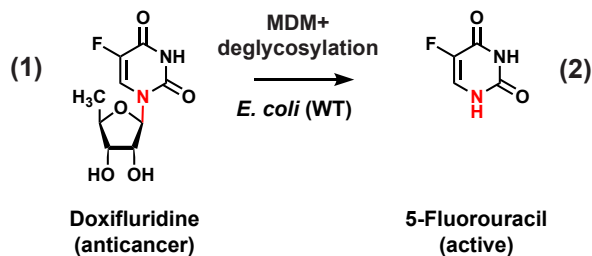

**Extracted Ion Chromatogram  
Doxifluridine (1)  
m/z= 245 (M-H)<sup>-</sup>**

**Extracted Ion Chromatogram  
5-Fluorouracil (2)  
m/z= 128 (M-H)<sup>-</sup>**

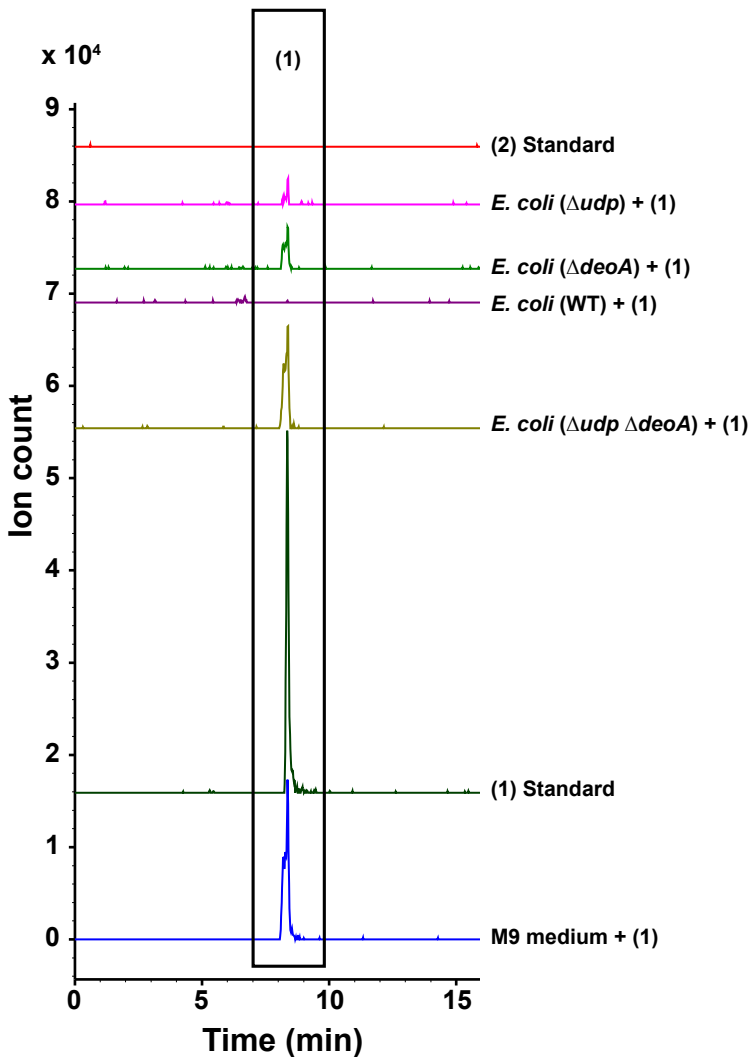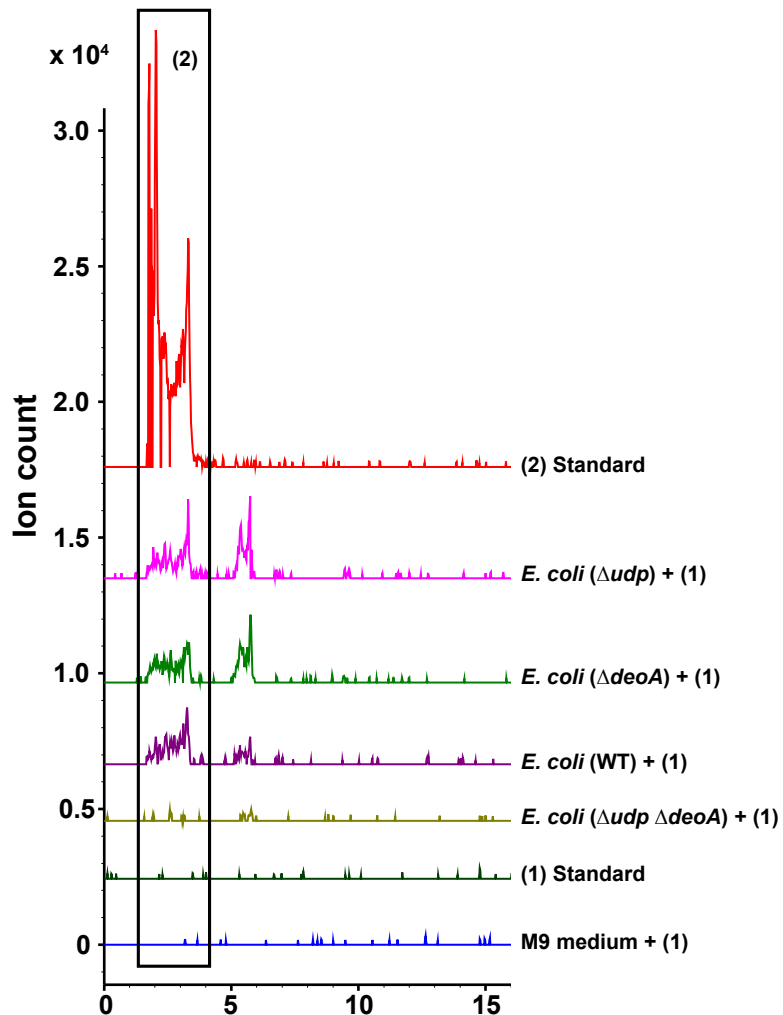

Supplement: NIHMS1603084-supplement-7.pdf [file NIHMS1603084-supplement-7.pdf]
