# Supplementary material
Source: PubMed Central journal article supplement (PMC8591631)

**a**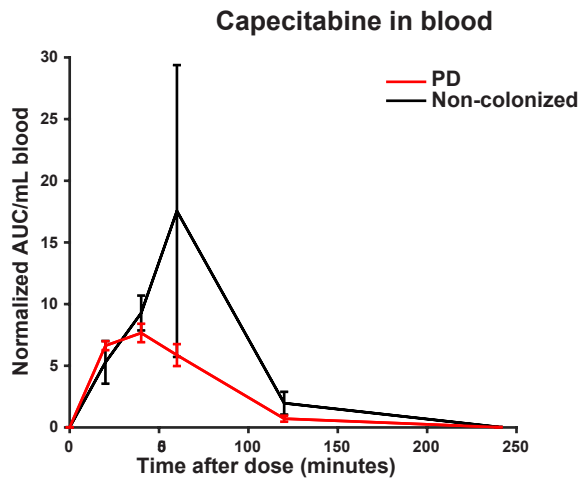**b**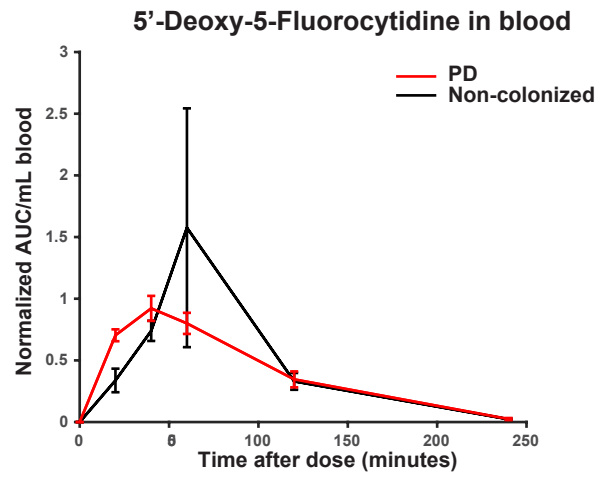**c**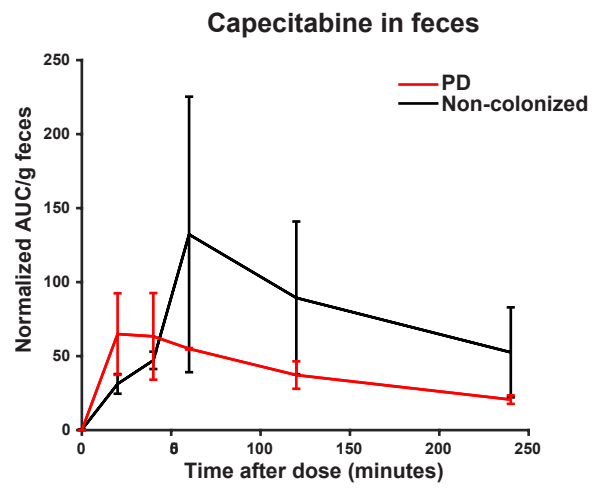

Supplement: NIHMS1603084-supplement-10.pdf [file NIHMS1603084-supplement-10.pdf]

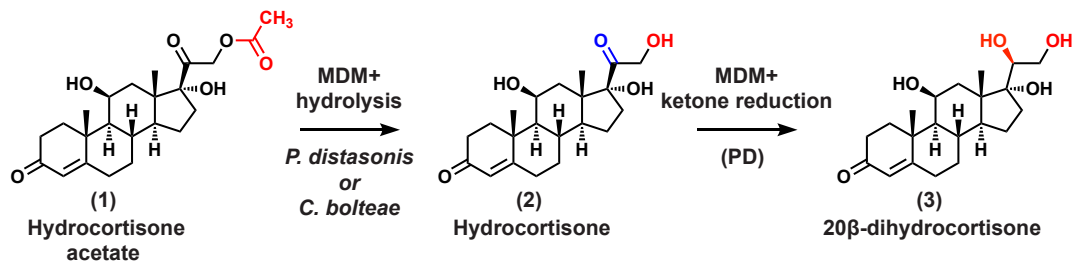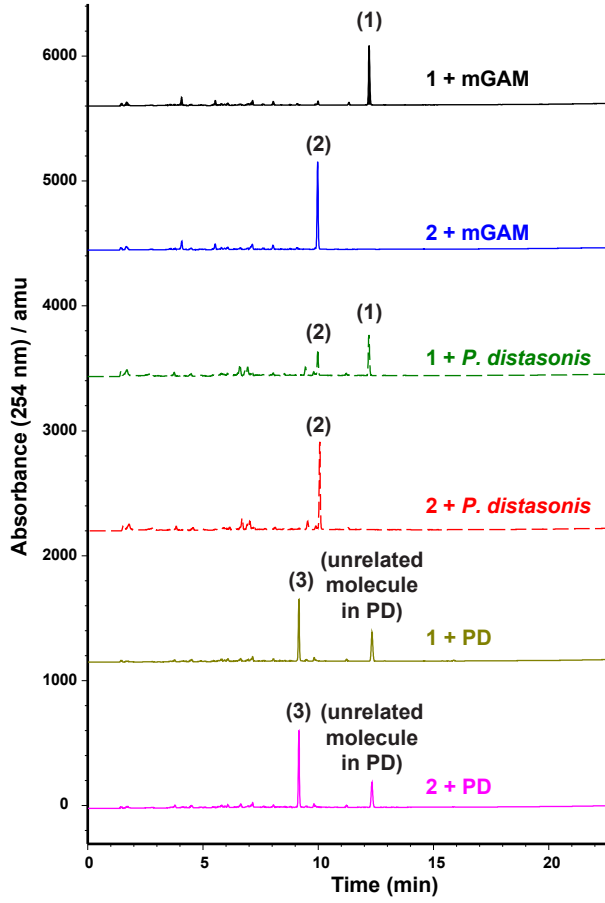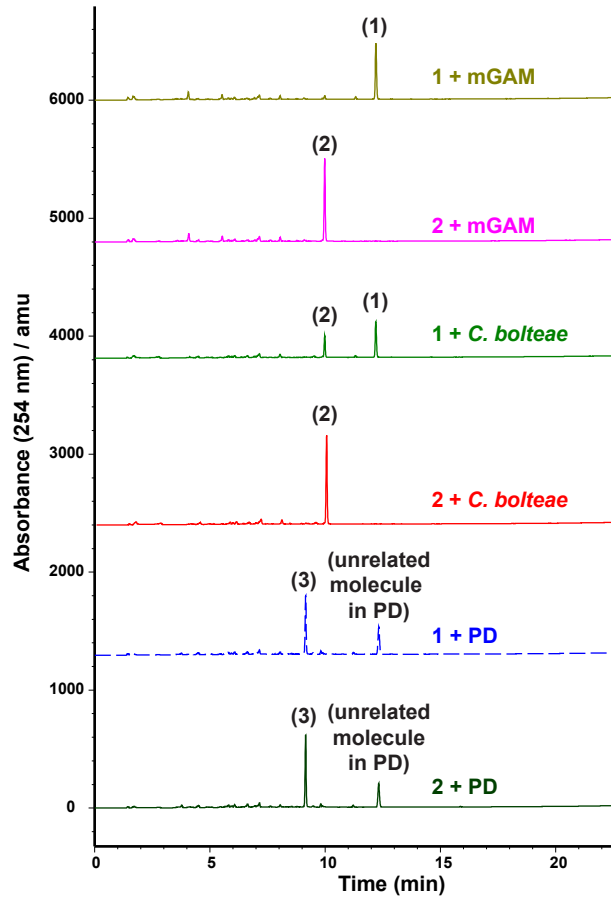

Supplement: NIHMS1603084-supplement-4.pdf [file NIHMS1603084-supplement-4.pdf]

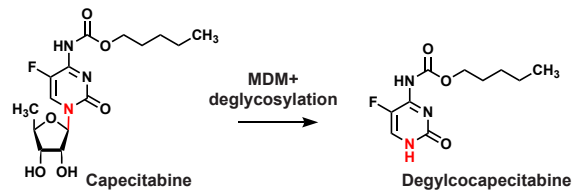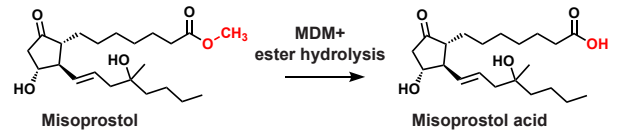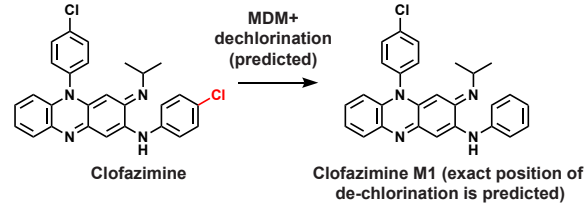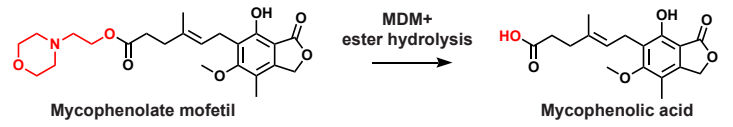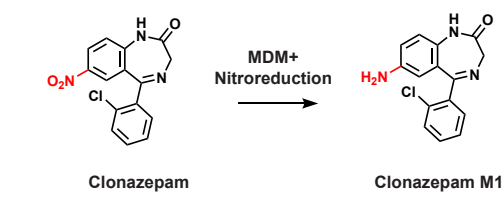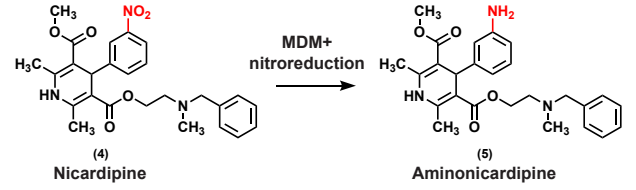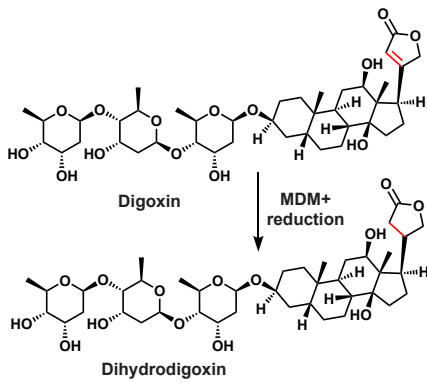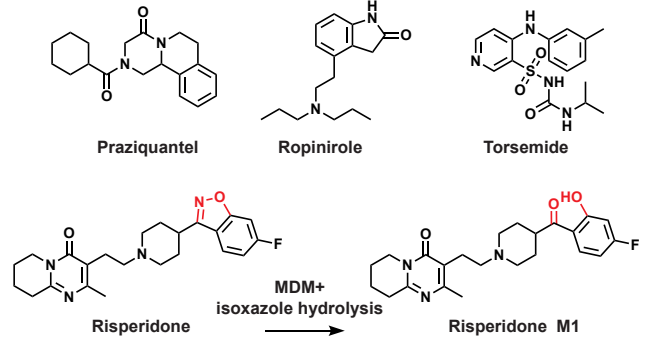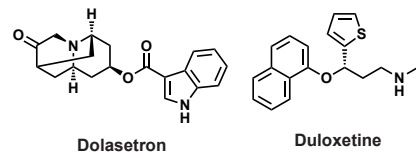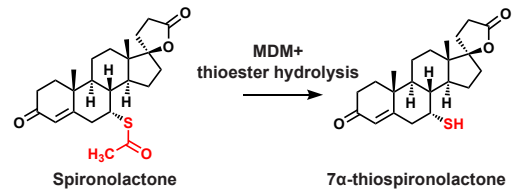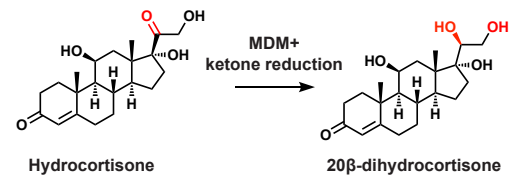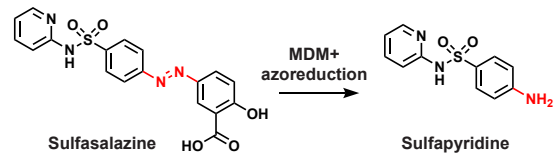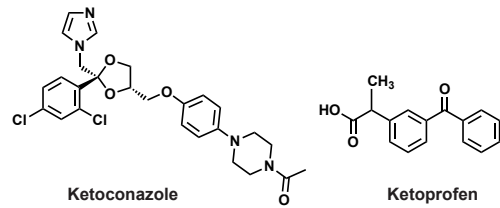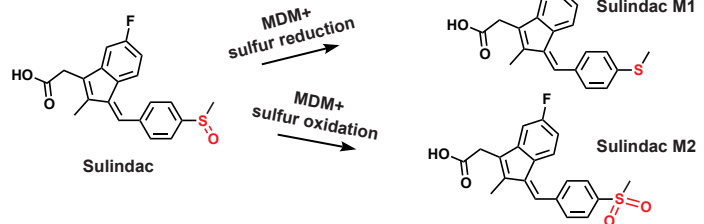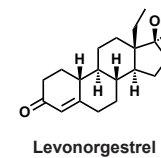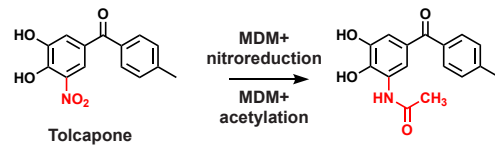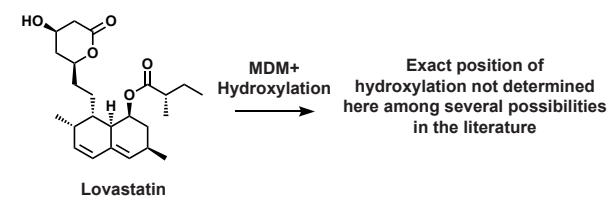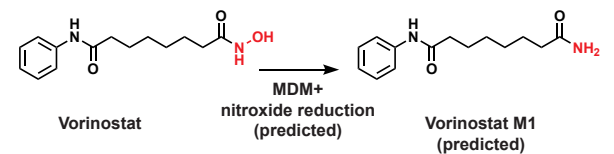

Supplement: NIHMS1603084-supplement-5.pdf [file NIHMS1603084-supplement-5.pdf]

A

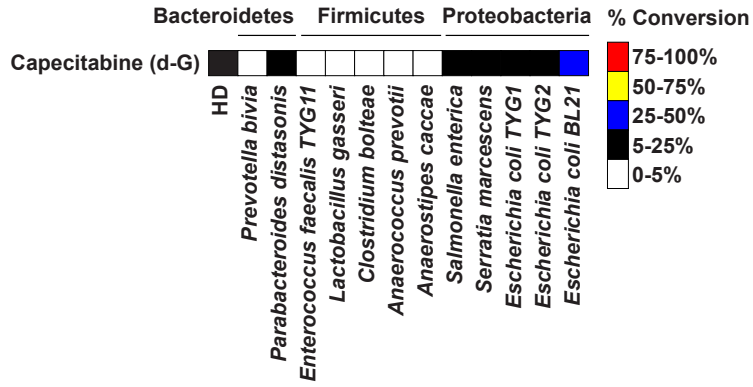

B

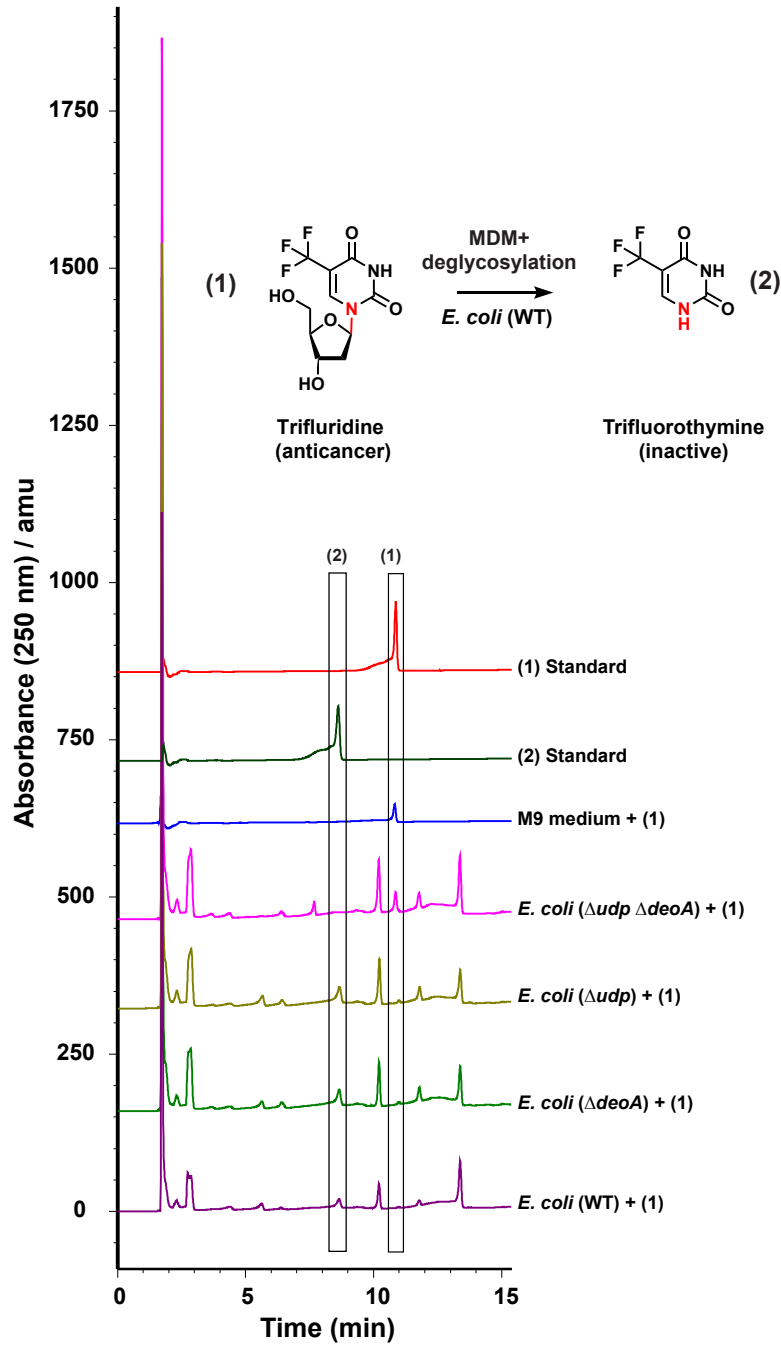

Supplement: NIHMS1603084-supplement-6.pdf [file NIHMS1603084-supplement-6.pdf]

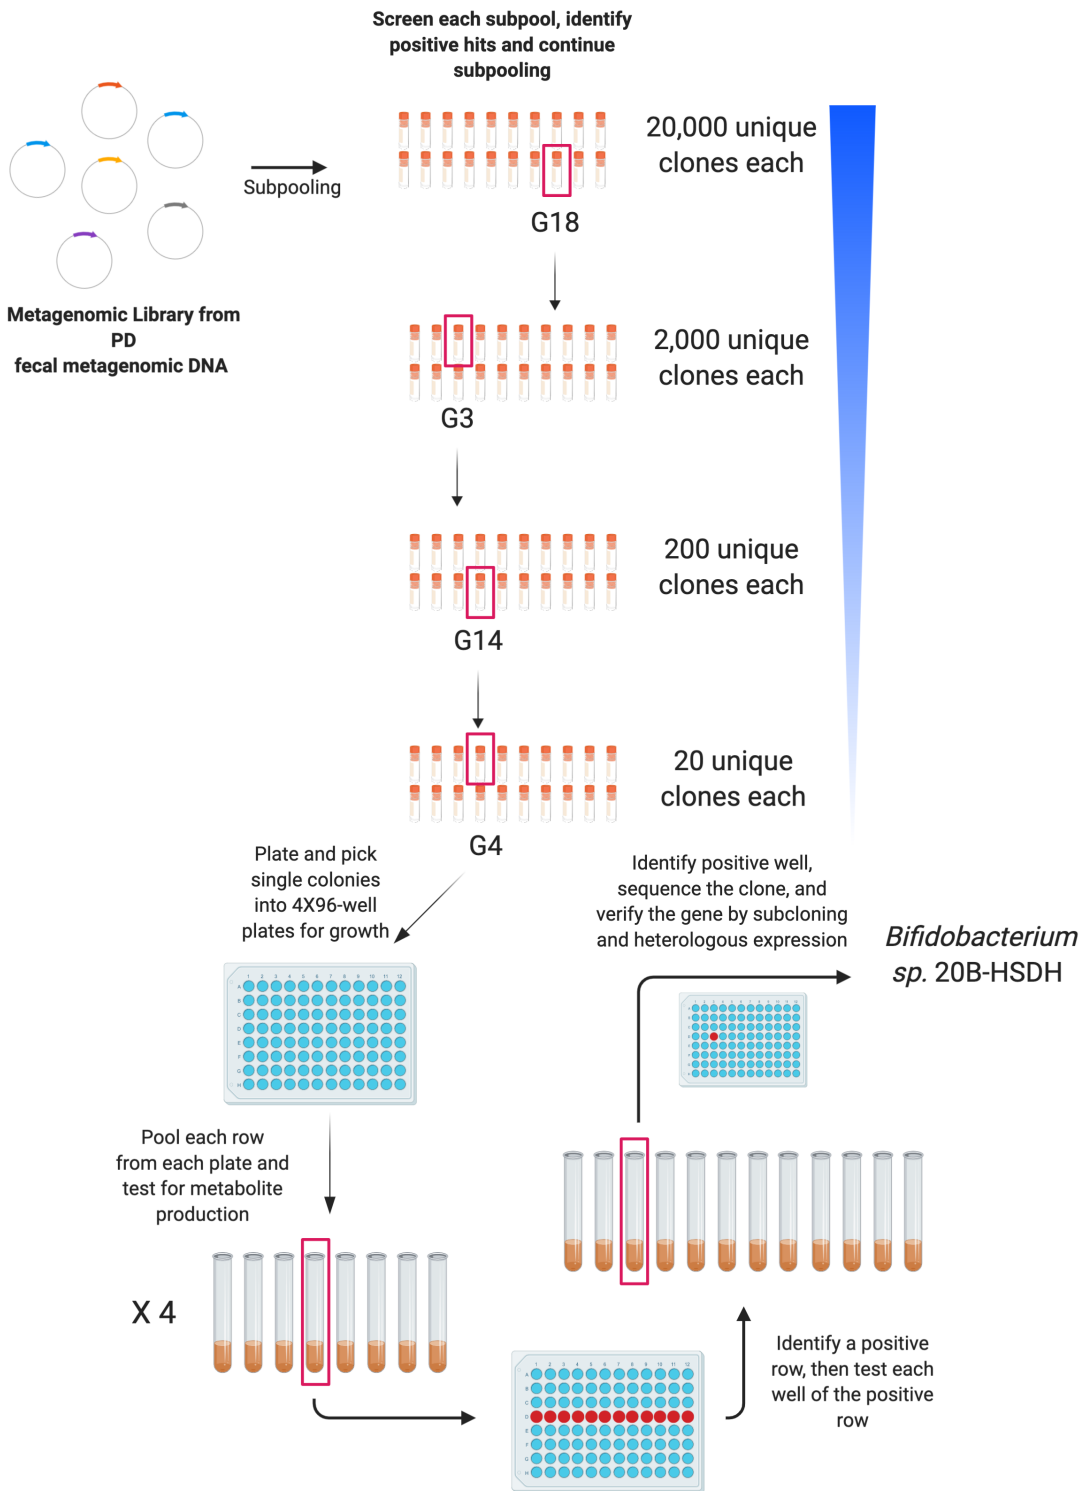

Supplement: NIHMS1603084-supplement-8.pdf [file NIHMS1603084-supplement-8.pdf]

**A**

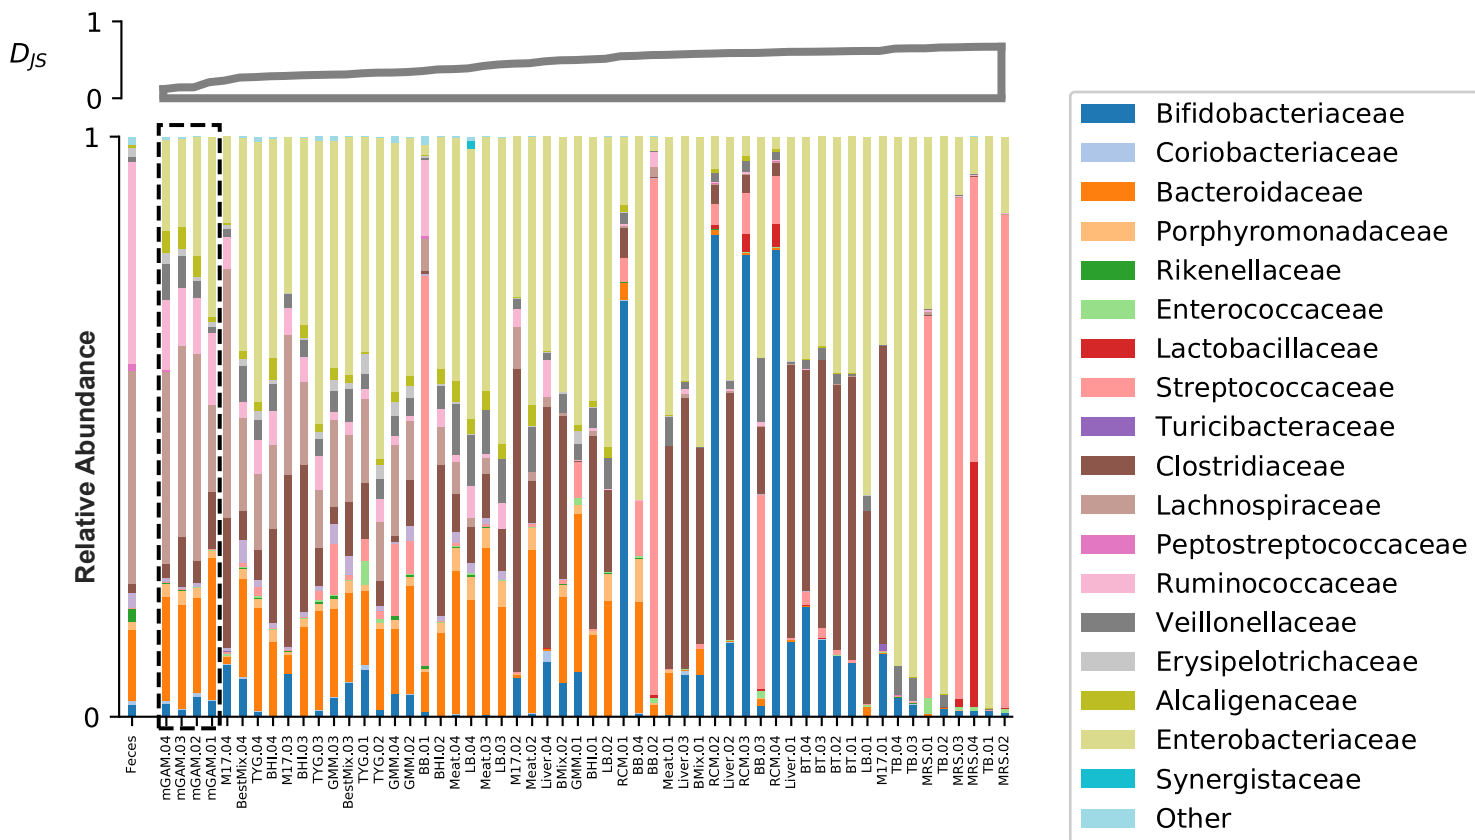

**B**

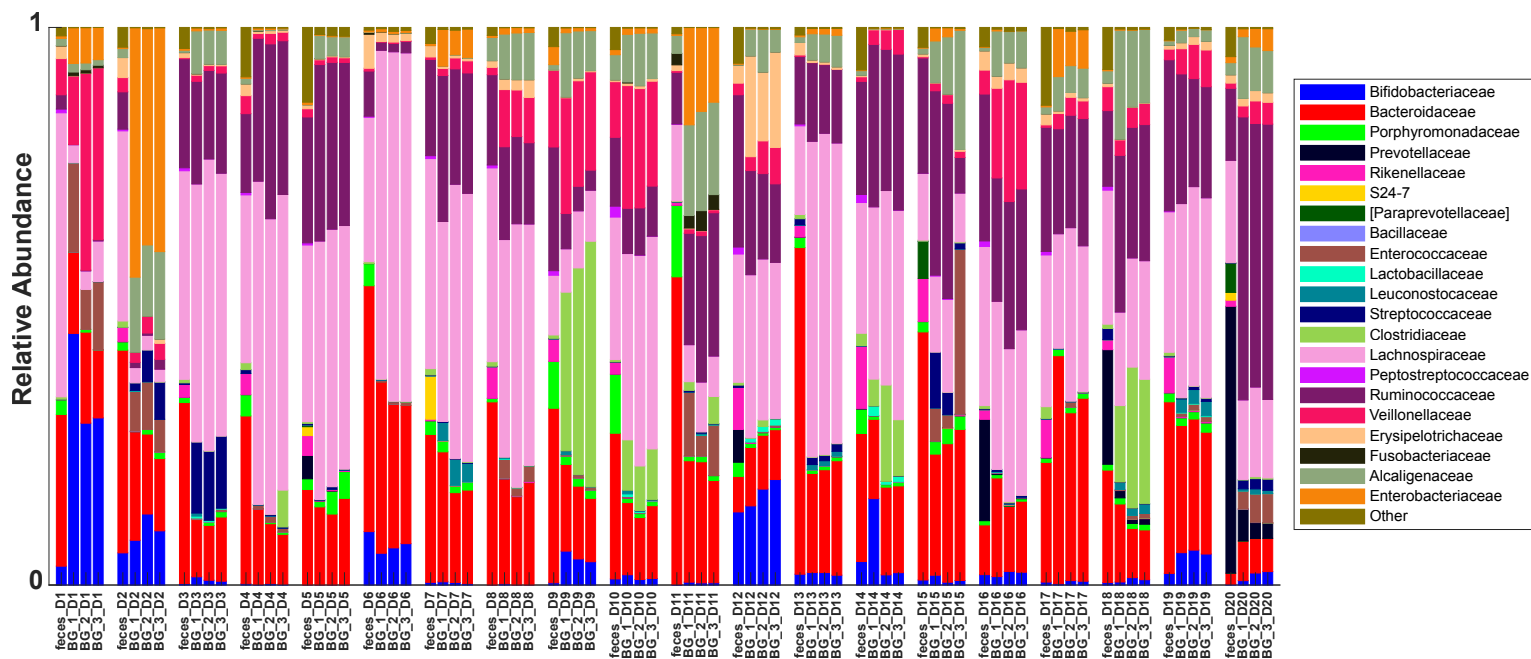

Supplement: NIHMS1603084-supplement-9.pdf [file NIHMS1603084-supplement-9.pdf]
